# Supplementary material for: Morphology, mixing state, and hygroscopicity of primary biologicalaerosol particles from a Chinese boreal forest
Source: Copernicus journal article supplement (doi:10.5194/acp-2019-539), 2019-06-17
Supplement: Supplementary file [file acp-2019-539-AC3-supplement.pdf]

1) Reading the comments from Reviewer #2 again, s/he raises some fundamentally important concerns in the overview of “major points of criticism” starting half-way down the first page. At that point s/he listed four major bullets to concerning the experimental assumptions of the study. S/he also listed four overall comments related to the organization and writing quality in the paragraph before. Lastly, s/he listed several pages worth of detailed comments, some of which are quite significant in themselves. I think all of these comments are relevant and worth carefully considering. I think it may indeed be possible to revise the manuscript sufficiently to raise it to a publishable quality, but that will depend on the nature of the revisions.

Response: We appreciated the editor to summary the comments. We carefully considered all the comments and revised manuscript. We almost rewrote the manuscript marked by red color.

Besides we considered the comments from the two referee's comments, one additional experiment which concerns the bacteria and fungi cultivated in the laboratory was added. During the revision period, we contacted several professors who are experts on bacteria molecular, ecology, and biology. Indeed, the classification on fine bacteria and fungi could be problem because some of fungi have almost same morphology with bacteria. Although bacteria normally have size at  $<2\ \mu\text{m}$  than fungi with size at  $1\text{-}10\ \mu\text{m}$ , the particle size could not be used to classify bacteria and fungi. Therefore, we carefully revised the particle classification here to guarantee the right contents for the potential readers.

As the reviewer's comments and literatures, fungal spores have typical morphology and larger size ( $> 2\mu\text{m}$ ). These particles easily have been identified from TEM and SEM images. Some previous studies well documented the fungal spores (Valsan et al., 2015; Wittmaack et al., 2005).

2) Most fundamentally, Reviewer #2 raised a number of concerns about the methods by which individual particles were classified. The lack of transparency on this issue indeed is one of the major areas of required improvement. After carefully adding specific details about how particles were assigned and categorized, it will be easier to evaluate the observations and conclusions. Without knowing more about the process by which particles were investigated and assigned, it is hard to know if the method itself was sufficient to support the conclusions. The question here is not just about clarifying wording, but that the clarified wording will help evaluate whether the method was sufficient or not. In particular, the question of whether the particle assignments were correct is not sufficiently addressed. Just because a systematic method is established is not a sufficient criterion to determine whether the method leads to correct assignment. For example, consider a skeptical scientist reader. Convince them that your method led to detection and consistent, correct categorization of the particle types you report.

Response: In the revised manuscript, we mainly revised the classification part. We carefully revised the method part and added more details. We tried to clearly make methods of particle classification. After we seriously considered their comments, we decided to prepare the standard samples of bacteria and fungi on the TEM grids. The laboratory samples can further confirm our mythology that TEM and SEM can well observe the bacteria or fungi. Moreover, the TEM and SEM observations of the standard bacteria and fungi are helpful to further

classify the ambient PBAPs collected in the boreal forest air. We found that bacteria and fungi have almost same morphology and composition. Although bacteria normally have smaller size than fungi, particle size could not be acted as one key element to classify the bacteria and fungi. We also noticed that most of bacteria and fungi have rod-like shape in our samples. As the reason, we named the rod-like PBAPs for this type of particles. Furthermore, we classified fungal spores and brochosomes based on the unique morphology of individual PBAPs. Here we added Figure 2 and Figure 6 and revised Figure 5.

As the revised part, we made major revisions on the particle classification. We precisely delivered the information for the potential reader. We had the detailed responses of two referee's comments.

3) - The observations and atmospheric implications are relatively similar to works that have used similar techniques in both boreal and tropical areas, but these are not well cited in the manuscript. At a minimum I suggest you to consider additional literature, and make sure to at least briefly compare results with these in mind. I suggest doing a good literature survey of PBAP observations from forests, as well as a search related to ambient studies related to microscopy of PBAP (i.e. SEM and TEM, as you use). Then make sure that the observations you present and the conclusions you draw are put into context of these previous measurements.

Response: We appreciated the editor's suggestion. Indeed, we missed some important literatures. In the revised manuscript, we added 23 papers to support our results. Please see our revised manuscript with red word part.

References:

Afanou, K. A., Straumfors, A., Skogstad, A., Nilsen, T., Synnes, O., Skaar, I., Hjeljord, L., Tronsmo, A., Green, B. J., and Eduard, W.: Submicronic Fungal Bioaerosols: High-Resolution Microscopic Characterization and Quantification, *Applied and Environmental Microbiology*, 80, 7122-7130, 10.1128/aem.01740-14, 2014.

Afanou, K. A., Straumfors, A., Skogstad, A., Skaar, I., Hjeljord, L., Skare, Ø., Green, B. J., Tronsmo, A., and Eduard, W.: Profile and Morphology of Fungal Aerosols Characterized by Field Emission Scanning Electron Microscopy (FESEM), *Aerosol Science and Technology*, 49, 423-435, 10.1080/02786826.2015.1040486, 2015.

Ault, A. P., and Axson, J. L.: Atmospheric Aerosol Chemistry: Spectroscopic and Microscopic Advances, *Analytical Chemistry*, 89, 430-452, 10.1021/acs.analchem.6b04670, 2017.

Coz, E., Art ñano, B., Clark, L. M., Hernandez, M., Robinson, A. L., Casuccio, G. S., Lersch, T. L., and Pandis, S. N.: Characterization of fine primary biogenic organic aerosol in an urban area in the northeastern United States, *Atmospheric Environment*, 44, 3952-3962, <https://doi.org/10.1016/j.atmosenv.2010.07.007>, 2010.

Coz, E., Gómez-Moreno, F. J., Pujadas, M., Casuccio, G. S., Lersch, T. L., and Art ñano, B.: Individual particle characteristics of North African dust under different long-range transport scenarios, *Atmospheric Environment*, 43, 1850-1863, 10.1016/j.atmosenv.2008.12.045, 2009.

Crawford, I., Robinson, N. H., Flynn, M. J., Foot, V. E., Gallagher, M. W., Huffman, J. A., Stanley, W. R., and Kaye, P. H.: Characterisation of bioaerosol emissions from a Colorado pine forest: results from the BEACHON-RoMBAS experiment, *Atmos. Chem. Phys.*, 14, 8559-8578, 10.5194/acp-14-8559-2014, 2014.

Crawford, I., Ruske, S., Topping, D. O., and Gallagher, M. W.: Evaluation of hierarchical agglomerative cluster analysis methods for discrimination of primary biological aerosol, *Atmos. Meas. Tech.*, 8, 4979-4991, 10.5194/amt-8-4979-2015, 2015.

Gosselin, M. I., Rathnayake, C. M., Crawford, I., Pöhlker, C., Fröhlich-Nowoisky, J., Schmer, B., Després, V. R., Engling, G., Gallagher, M., Stone, E., Pöschl, U., and Huffman, J. A.: Fluorescent bioaerosol particle, molecular tracer, and fungal spore concentrations during dry and rainy periods in a semi-arid forest, *Atmos. Chem. Phys.*, 16, 15165-15184, 10.5194/acp-16-15165-2016, 2016.

Harrison, R. M., Jones, A. M., Biggins, P. D. E., Pomeroy, N., Cox, C. S., Kidd, S. P., Hobman, J. L., Brown, N. L., and Beswick, A.: Climate factors influencing bacterial count in background air samples, *International Journal of Biometeorology*, 49, 167-178, 10.1007/s00484-004-0225-3, 2005.

Lacey, M. E., and West, J. S.: *The Air Spora: A Manual for Catching and Identifying Airborne Biological Particles*, Springer: Dordrecht, The Netherlands, 2006.

Manninen, H. E., Back, J., Sihto-Nissila, S. L., Huffman, J. A., Pessi, A. M., Hiltunen, V., Aalto, P. P., Hidalgo, P. J., Hari, P., Saarto, A., Kulmala, M., and Petaja, T.: Patterns in airborne pollen and other primary biological aerosol particles (PBAP), and their contribution to aerosol mass and number in a boreal forest, *Boreal Environment Research*, 19, 383-405, 2014.

Martin, S. T., Andreae, M. O., Artaxo, P., Baumgardner, D., Chen, Q., Goldstein, A. H., Guenther, A., Heald, C. L., Mayol-Bracero, O. L., McMurry, P. H., Pauliquevis, T., Pöchl, U., Prather, K. A., Roberts, G. C., Saleska, S. R., Silva Dias, M. A., Spracklen, D. V., Swietlicki, E., and Trebs, I.: Sources and properties of Amazonian aerosol particles, *Rev. Geophys.*, 48, RG2002, 10.1029/2008rg000280, 2010.

Morris, C. E., Conen, F., Alex Huffman, J., Phillips, V., Pöschl, U., and Sands, D. C.: Bioprecipitation: a feedback cycle linking Earth history, ecosystem dynamics and land use through biological ice nucleators in the atmosphere, *Global Change Biol.*, 20, 341-351, 10.1111/gcb.12447, 2014.

Nikkels, A. H., Terstegge, P., and Spieksma, F. T. M.: Ten types of microscopically identifiable airborne fungal spores at Leiden, The Netherlands, *Aerobiologia*, 12, 107, 10.1007/bf02446602, 1996.

Priyamvada, H., Singh, R. K., Akila, M., Ravikrishna, R., Verma, R. S., and Gunthe, S. S.: Seasonal variation of the dominant allergenic fungal aerosols – One year study from southern Indian region, *Scientific Reports*, 7, 11171, 10.1038/s41598-017-11727-7, 2017.

Riemer, N., Ault, A. P., West, M., Craig, R. L., and Curtis, J. H.: Aerosol Mixing State: Measurements, Modeling, and Impacts, *Rev. Geophys.*, 57, <https://doi.org/10.1029/2018RG000615>, 10.1029/2018rg000615, 2019.

Smith, D. J., Ravichandar, J. D., Jain, S., Griffin, D. W., Yu, H., Tan, Q., Thissen, J., Lusby, T., Nicoll, P., Shedler, S., Martinez, P., Osorio, A., Lechniak, J., Choi, S., Sabino, K., Iverson, K., Chan, L., Jaing, C., and McGrath, J.: Airborne Bacteria in Earth's Lower Stratosphere Resemble Taxa Detected in the Troposphere: Results From a New NASA Aircraft Bioaerosol Collector (ABC), *Frontiers in Microbiology*, 9, 10.3389/fmicb.2018.01752, 2018.

Tamer Vestlund, A., Al-Ashaab, R., Tyrrel, S. F., Longhurst, P. J., Pollard, S. J. T., and Drew, G. H.: Morphological classification of bioaerosols from composting using scanning electron microscopy, *Waste Management*, 34, 1101-1108, <https://doi.org/10.1016/j.wasman.2014.01.021>, 2014.

Tong, Y., and Lighthart, B.: The Annual Bacterial Particle Concentration and Size Distribution in the Ambient Atmosphere in a Rural Area of the Willamette Valley, Oregon, *Aerosol Science and Technology*, 32, 393-403, 10.1080/027868200303533, 2000.

Toprak, E., and Schnaiter, M.: Fluorescent biological aerosol particles measured with the Waveband Integrated Bioaerosol Sensor WIBS-4: laboratory tests combined with a one year field study, *Atmos.*

Chem. Phys., 13, 225-243, 10.5194/acp-13-225-2013, 2013.

Valsan, A. E., Ravikrishna, R., Biju, C. V., Pöhlker, C., Després, V. R., Huffman, J. A., Pöschl, U., and Gunthe, S. S.: Fluorescent biological aerosol particle measurements at a tropical high-altitude site in southern India during the southwest monsoon season, *Atmos. Chem. Phys.*, 16, 9805-9830, 10.5194/acp-16-9805-2016, 2016.

Whitehead, J. D., Darbyshire, E., Brito, J., Barbosa, H. M. J., Crawford, I., Stern, R., Gallagher, M. W., Kaye, P. H., Allan, J. D., Coe, H., Artaxo, P., and McFiggans, G.: Biogenic cloud nuclei in the central Amazon during the transition from wet to dry season, *Atmos. Chem. Phys.*, 16, 9727-9743, 10.5194/acp-16-9727-2016, 2016.

Wilson, T. W., Ladino, L. A., Alpert, P. A., Breckels, M. N., Brooks, I. M., Browse, J., Burrows, S. M., Carslaw, K. S., Huffman, J. A., Judd, C., Kilthau, W. P., Mason, R. H., McFiggans, G., Miller, L. A., Nájera, J. J., Polishchuk, E., Rae, S., Schiller, C. L., Si, M., Temprado, J. V., Whale, T. F., Wong, J. P. S., Wurl, O., Yakobi-Hancock, J. D., Abbatt, J. P. D., Aller, J. Y., Bertram, A. K., Knopf, D. A., and Murray, B. J.: A marine biogenic source of atmospheric ice-nucleating particles, *Nature*, 525, 234, 10.1038/nature14986, 2015.

4) - The statement in the manuscript that the work can be used as a “full database” to “be used to identify primary biological particles using single particle techniques” is overstated in my opinion. I think that that study can be revised to show an overview of observations of (bio)-particles in this region, but using the results as a database for future reference is entirely different. This would require a substantially higher threshold of demonstrated quality, which may or may not have been achieved. To claim these data as basis for a database of atmospheric particles implies that a sufficiently systematic representation of bioparticles has been sampled and correctly analyzed. Further, the database would need to show some sort of independent verification that particles were assigned correctly, similar to above comments. Since most methods of independent identification are well beyond the scope of the work you reported, I do not expect that you would want to argue that the assignments have necessarily been verified as correct. They are merely suggestions, with uncertainties and potential assignment errors to be at least briefly discussed in the revised manuscript. So in that case I would suggest that at a minimum you scale back the conclusions to remove the concept of ‘database,’ and report in the context of ‘observations’. This does not get around the first concerns that Reviewer #2 raised about categorization of particle type, but it will help to re-frame the conclusions a bit. I strongly suggest keeping all these comments, including those from the two Reviewers, closely in mind as you revise and respond to all comments line-by-line. I look forward to reviewing the revised manuscript when available.

**Response:** We noticed that we made overstate. In the revised manuscript, we deleted such words and carefully gave the conclusions. About the classification part, we made one major revision. We also modified the title. We all carefully response the comments raised by the two referees.

1 **Overview of primary biological aerosol particles from a Chinese**  
2 **boreal forest: insight into morphology, size, and mixing state at**  
3 **microscopic scale**

4 Weijun Li<sup>1</sup>, Lei Liu<sup>1</sup>, Qi Yuan<sup>1</sup>, Liang Xu<sup>1</sup>, Yanhong Zhu<sup>1</sup>, Bingbing Wang<sup>2</sup>, Hua Yu<sup>3</sup>, Xiaokun  
5 Ding<sup>4</sup>, Jian Zhang<sup>1</sup>, Dao Huang<sup>1</sup>, Dantong Liu<sup>1</sup>, Wei Hu<sup>5</sup>, Daizhou Zhang<sup>6</sup>, Pingqing Fu<sup>5</sup>, Maosheng  
6 Yao<sup>7</sup>, Min Hu<sup>7</sup>, Xiaoye Zhang<sup>8</sup>, Zongbo Shi<sup>9,5</sup>

7 <sup>1</sup>Department of Atmospheric Sciences, School of Earth Sciences, Zhejiang University, Hangzhou  
8 310027, China

9 <sup>2</sup>State Key Laboratory of Marine Environmental Science, College of Ocean and Earth Sciences,  
10 Xiamen University, Xiamen 361102, China.

11 <sup>3</sup>College of Life and Environmental Sciences, Hangzhou Normal University, 310036, Hangzhou, China

12 <sup>4</sup>Department of Chemistry, Zhejiang University, Hangzhou 310027, China

13 <sup>5</sup>Institute of Surface-Earth System Science, Tianjin University, 300072, Tianjin, China

14 <sup>6</sup>Faculty of Environmental and Symbiotic Sciences, Prefectural University of Kumamoto,  
15 Kumamoto 862-8502, Japan

16 <sup>7</sup>State Key Joint Laboratory of Environmental Simulation and Pollution Control, College of  
17 Environmental Sciences and Engineering, Peking University, Beijing 100871, China

18 <sup>8</sup>Key Laboratory of Atmospheric Chemistry, Chinese Academy of Meteorological Sciences, Beijing,  
19 China

20 <sup>9</sup>School of Geography, Earth and Environmental Sciences, University of Birmingham, Birmingham  
21 B15 2TT, UK

22 *\*Correspondence to: Weijun Li (liweijun@zju.edu.cn)*

**Abstract:**

Biological aerosols play an important role in atmospheric chemistry, clouds, climate, and public health. Here, we studied the morphology and composition of primary biological aerosol particles (PBAPs) collected in the Lesser Khingan Mountain boreal forest of China in summertime using transmission electron microscopy (TEM) and scanning electron microscopy (SEM). C, N, O, P, K, and Si were detected in most of the PBAPs, and P represented a major marker to discriminate the PBAPs and non-PBAPs. Of all detected particles > 100 nm in diameter, 13% by number were identified as PBAPs. We found that one type of PBAPs mostly appeared as similar rod-like shapes with an aspect ratio > 1.5 and the dominant sizes ranged from 1  $\mu\text{m}$  to 5  $\mu\text{m}$ . The size distribution of the rod-like PBAPs displays two typical peaks at 1.4  $\mu\text{m}$  and 3.5  $\mu\text{m}$ , which likely are bacteria and fungal particles in the forest air. The second most PBAPs were identified as fungal spores with ovoid, sub-globular or elongated shapes with a smooth surface and small protuberances with their dominant size range of 2 - 5  $\mu\text{m}$ . Moreover, we found some large brochosomal clusters containing hundreds of brochosomes with a size range of 200-700 nm and a shape like a truncated icosahedron. The number size distribution of PBAPs coupled with  $\text{PM}_{2.5}$  and  $\text{PM}_{10}$  concentrations were used to estimate the total mass concentration of PBAPs, which is approximately  $1.9 \mu\text{g m}^{-3}$  and accounts for 47% of the in situ  $\text{PM}_{2.5-10}$  mass. Moreover, there is a higher frequency and concentration of PBAPs at night compared with day, suggesting that the relative humidity dramatically enhances the PBAPs emissions in the boreal forest. Our study also showed that the fresh PBAPs displayed weak hygroscopicity with a growth factor of  $\sim 1.09$  at  $\text{RH}=94\%$ . TEM revealed that about 20% of the rod-like PBAPs were internally mixed with metal, mineral dust, and inorganic salts in the boreal forest air. This work for the first time provides the overview of individual PBAPs from nanoscale to microscale in Chinese boreal forest air.

47

48 **Key points**

49

- 50 • Based on morphology, composition, and size of individual PBAPs, rod-like PBAPs (e.g.,  
51 bacteria and fungi), fungal spores, and brochosomes were identified.
- 52 • PBAPs emissions tend to occur with high humidity at night rather than during the day.
- 53 • Hygroscopic experiments show that most of the PBAPs displayed weak hygroscopicity, and  
54 their growth factor was  $\sim 1.09$  at RH=94%.

55

## 1. Introduction

Primary biological aerosol particles (PBAPs) (e.g., bacteria, spores, fungi, viruses, algae, and pollen) are ubiquitous in the Earth's atmosphere and **important** elements in the life cycle of many organisms and ecosystems (Poschl, 2005; Tunved et al., 2006; Smith et al., 2018). PBAPs are airborne biological materials that are transported from the biosphere to the atmosphere (Huffman et al., 2010), and they can account for a large proportion **(25-45%)** of the aerosol particle mass in pristine forest air **and certain amounts** in some rural and **marine air** (Elbert et al., 2007; Bauer et al., 2008; Hu et al., 2017; May et al., 2018). **The growing research interest in PBAPs has one of its goals to better understand how PBAPs or their cell fragments influence cloud condensation nuclei (CCN) and ice nuclei (IN) (Morris et al., 2004; Huffman et al., 2013; Ling et al., 2018). Furthermore, field campaigns have found that abundant biological aerosols occur in cloud ice-crystals, fog/cloud, rain, and snowfall (Amato et al., 2005; Mhler et al., 2007; Christner et al., 2008; Pratt et al., 2009; Prenni et al., 2009; Tobo et al., 2013; Morris et al., 2014; Wilson et al., 2015; Twohy et al., 2016; Hu et al., 2018). These studies addressed the hypothesis that PBAPs indeed influence the hydrological cycle and climate by initiating the formation of clouds and precipitation as CCN and IN or by their bioprecipitation feedbacks.**

**Previous studies have investigated particle number concentration, size, and composition of primary biological aerosols using online measurement techniques and advanced molecular biological analyses (Wittmaack et al., 2005; Elbert et al., 2007; Frhlich-Nowoisky et al., 2009; Huffman et al., 2010; Desprs et al., 2012; Crawford et al., 2015; Hu et al., 2017; Therkorn et al., 2017; Zhang et al., 2017; Chen and Yao, 2018). For example, the contribution of fungal spores to total organic carbon was estimated to be approximately 10% in clean and polluted periods in Beijing**



using an online wideband integrated bioaerosol sensor (WIBS) (Yue et al., 2017); To obtain the organisms of PBAPs in the atmosphere, many studies tend to detect biochemical markers (e.g., proteins, fatty acids, sugars) and nucleic acids (i.e., DNA and RNA) to determine their origins such as plant or animal debris, bacteria, fungi, or viruses (Georgakopoulos et al., 2009; Chen and Yao, 2018; Hu et al., 2018; Ling et al., 2018). Although these previous studies provided comprehensive species or detailed molecular compositions of PBAPs, they still could not reflect the physical properties of individual PBAPs in the atmosphere, such as morphology, size, phase, hygroscopicity, and mixing state. Besides particle composition, the previous studies have proved that the morphology, size, and mixing state of individual particles more or less influence their CCN and IN activities and optical properties (Spracklen et al., 2008; Fröhlich-Nowoisky et al., 2009; Wilson et al., 2015; Li et al., 2016; Ault and Axson, 2017; Riemer et al., 2019). Therefore, it is critical to characterize detailed information of different types of individual PBAPs from their natural sources.

In the past decades, several studies have used scanning electron microscopy (SEM) to characterize the morphology and size of individual PBAPs (Nikkels et al., 1996; Wittmaack et al., 2005; Coz et al., 2010; Tamer Vestlund et al., 2014; Valsan et al., 2015; China et al., 2018). They identified fungal spores, brochosome, pollen, and plant or insect debris larger than 2  $\mu\text{m}$  in the atmosphere. Although the SEM observations adequately characterized the coarse fungal spores, pollen, and plant or insect debris particles, comparable results have not been obtained for fine bacteria and fungal particles, which together account for a large number of suspended particles in ambient air detected by online instruments (Tong and Lighthart, 2000; Després et al., 2012; Afanou et al., 2014; Valsan et al., 2016; Priyamvada et al., 2017; Hu et al., 2018). The reason for this shortfall is likely that SEM could not clearly observe carbonaceous bioaerosols smaller than 1  $\mu\text{m}$  (Li et al.,

2016;Ault and Axson, 2017). Posfai et al. (2003) and Patterson et al. (2016) used transmission electron microscopy (TEM) to detect some fine bacteria in marine air. However, there is no study to characterize the morphology, size, and mixing state of individual PBAPs from nanoscale to microscale. For example, many studies directly used SEM images showing the coarse PBAPs (e.g., fungal spores) in support of their conclusions, but missed large numbers of fine PBAPs (e.g., bacteria) (Shi et al., 2003;Wittmaack et al., 2005;Coz et al., 2009;Shi et al., 2009;Martin et al., 2010;Huffman et al., 2012;Tamer Vestlund et al., 2014;Afanou et al., 2015;Valsan et al., 2015;Valsan et al., 2016;Priyamvada et al., 2017;Wu et al., 2019). The result might discourage people considering fine bacteria and fungal particles for their atmospheric effects or for their examination of data from some online instruments. Therefore, it is necessary to integrate SEM and TEM to characterize the morphology, size, and mixing state of individual PBAPs from nanoscale to microscale.

Forests are important contributors of primary biological aerosols in the atmosphere (Tunved et al., 2006;Spracklen et al., 2008;Després et al., 2012;Whitehead et al., 2016). Aerosols in large forests contain abundant biological particles from plants emitted locally and lesser amounts of anthropogenic pollutants from long-range transport (Tong and Lighthart, 2000;Tunved et al., 2006;Gabey et al., 2010;Martin et al., 2010). We chose the Lesser Khingan Mountains in northeast China, which is its second largest boreal forest. In this study, TEM and SEM both have been employed to characterize the morphology, size, and mixing state of various PBAPs collected over the boreal forest. Furthermore, hygroscopic experiments on the primary biological particles have been conducted.

## 2. Methods

### 2.1 Sampling site and sample collection

The sampling site is at the Heilongjiang Liangshui National Nature Reserve (47.32°N, 128.54°E; 350m above sea level) in the center of the Lesser Khingan Mountains of northeast China (Figure 1). The boreal region is characterized by large seasonal variations in temperature, and the flora is dominated by Korean pine and spruce species. There are no anthropogenic sources of pollutants, such as villages, industries and vehicles within 80 km of the sampling site. Boreal forests have the highest emissions of biological aerosols during summer. Because there is less rain in late August, we selected 14-21 August, 2016 to collect the bioaerosol samples.

Individual particle samples were collected both on copper (Cu) TEM grids coated with carbon film (carbon type-B, 300-mesh copper; Tianld Co., China) and on silicon membranes (thickness: 500±10 µm, size: 3×3 mm; LIJINGKEJI, China) by a single-stage cascade impactor called the DKL-2 sampler (Genstar Electronic Technology, China). The collection efficiency of the impactor is 50% for particles with an aerodynamic diameter of 0.1 µm when we assume an aerosol particle density of 2 g cm<sup>-3</sup>. We collected individual particles four times each day at 9:00, 15:00, 21:00, and 02:00 local time. At each sampling event, we first collected TEM grids and then changed to silicon wafers in the sampler. The sampling duration at each time varied from 10 min to 25 min depending on the particle distribution on the substrate. The substrates of the carbon film and silicon wafer both have smooth surfaces with no contamination before we use them to collect aerosol particles. After sample collection, we immediately performed optical microscopy (BST60-100, China) at 100X magnification to determine whether the aerosol distribution on the substrate was suitable for electron microscopy analysis. The distribution of aerosol particles on TEM grids was not uniform, with

coarser particles occurring near the center and finer particles on the periphery. The quick check by the optical microscopy enabled us to tell whether individual particles were well distributed and whether there was any overlap on the substrate. Whenever the distribution was not even enough or when substantial overlap occurred, we had to discard it and re-collect individual particle samples through adjusting the sampling duration. In a word, this sampling procedure guarantees that the collected particles were adequately separated and did not overlap each other on the substrate (Li et al., 2016). The Cu grids and silicon wafers were placed in a dry, clean, and airtight container with 25 °C and 20±3% RH which minimizes exposure to ambient air and preserves them for subsequent analysis. The detailed sampling and storage procedures are summarized in Figure S1.

The daily PM<sub>2.5</sub> and PM<sub>10</sub> samples were collected on quartz-fiber filters with a diameter of 90 mm through two medium-volume samplers (TH-150, Wuhan Tianhong, China) at a constant flow rate of 100 L min<sup>-1</sup>. The samples were changed at 08:00 a.m. each day. The DKL-2 and TH-150 samplers and other monitoring instruments in the field experiment were installed on a building roof 15 m above ground. The quartz filters (Whatman, UK) were put in polyethylene boxes immediately after sampling and stored at -5 °C. They were equilibrated at a constant temperature (20 ±0.5 °C) and humidity (50 ± 2%) for over 24 h before being weighed with an electronic microbalance (Sartorius-ME5, Germany). This gravimetric procedure provides the mass concentration of PM<sub>2.5</sub> and PM<sub>10</sub>.

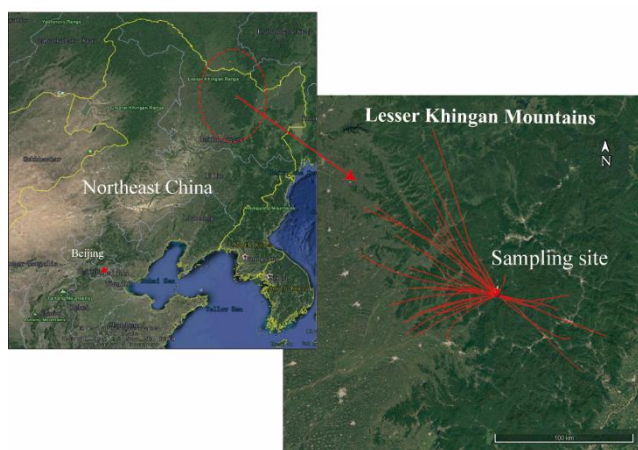

**Figure 1** Location of the sampling site and 6-h air mass back trajectories arriving at each sampling time from 14-21 August, 2016 in a boreal forest of the Lesser Khingan Mountain in Northeast China. The map source is Google Earth.

## 2.2 Transmission electron microscopy analysis

Individual aerosol particles collected on Cu grids were analyzed via transmission electron microscopy (TEM, JEM-2100, JEOL Ltd., Japan) at a 200 kV accelerating voltage. TEM with a beam of electrons is transmitted through a specimen to form an image. An image is formed from the interaction of the electrons with the sample as the beam is transmitted through the specimen. Therefore, TEM images display the inner physical structure of individual particles and the mixing state of different components. The TEM system is equipped with an energy-dispersive X-ray spectrometer (EDS, INCA X-Max<sup>N</sup> 80T, Oxford Instruments, UK). EDS is an analytical technique used for the elemental analysis or chemical characterization of a sample. It relies on an interaction between X-rays and a sample. EDS spectra show the peaks of different elements and the contribution of each element in the total. EDS semiquantitatively detects the elemental composition of individual particles with an atomic number greater than six ( $Z > 6$ ). However, Cu peaks in the EDS spectra were not considered because of interference from the copper substrate of TEM grids. We determined the morphology, composition, and mixing state of individual particles through the combination of TEM and EDS. To reduce the damage to particles under the electron beam, the EDS collection duration was limited to 15 s. Individual particles are distributed on TEM grids, with the coarser particles in the center of sampling spot and with the finer particles on the periphery. Therefore, to guarantee that the analyzed particles are representative, five areas are selected from

the sampling center to the periphery on each TEM grid. After a labor-intensive operation, we analyzed 150-250 individual particles with diameters of 100 nm-10  $\mu\text{m}$  in each sample. Finally, we successfully analyzed 20 TEM grids in the study. TEM/EDS can determine the internal mixing structure of different aerosol components in fine particles and their specific composition. TEM clearly shows the morphology of particles smaller than 2  $\mu\text{m}$ . For some larger particles, we might further carry the scanning electron microscopy (SEM) experiments to determine their morphology. In this study, we did observe one fungi (*Yeast*) and one bacteria (*colibacillus*) sample through TEM, which were prepared in biological laboratories (Figure S2). Microscopic observations from the bacteria and fungi samples prepared in the laboratory were helpful to classify PBAPs emitted from the forest.

Once we clearly obtained electron images of different particles, we could then measure particle size and shape factors. In this study, the area, perimeter, shape factor, and equivalent circle diameter (ECD) of individual particles in TEM images are manually or automatically obtained through an image analysis software (RADUS, EMSIS GmbH, Germany). Based on these measurements, we can classify particle types and determine the diameter and shape factor of individual particles among different particle types. Moreover, we statistically analyze the number fractions in different size bins.

Aspect Ratio is the maximum ratio between the length and width of a bounding box for the measured object. An aspect ratio of 1 (the lowest value) indicates that a particle is not elongated in any direction. The aspect ratio is defined as

$$AR = \frac{L_{max}}{W_{max}}$$

### 2.3 Scanning electron microscopy analysis

SEM is performed using a type of electron microscope that can determine the particle surface by scanning it with a high-energy beam of electrons in a raster scan pattern. An SEM system (Zeiss Ultra 55) equipped with a field emission gun operating at 5–20 kV was used to obtain detailed information on the surfaces of individual aerosol particles. Moreover, the SEMx was equipped with an energy-dispersive X-ray spectrometry (EDS), which can analyze the chemical composition of

individual particles. The SEM/EDS can efficiently obtain the surface morphology, size, and composition of coarse particles without any coating process on the substrate. Finally, we selected six silicon wafers for SEM/EDS analysis (Figure S1). In this study, we used SEM/EDS to observe surface morphology of the coarse particles on silicon wafers and to confirm particle types which cannot be clearly shown in TEM images.

## 2.4 Hygroscopic experiments

A custom-made individual particle hygroscopic (IPH) system was used to observe the hygroscopic properties of individual biological particles at different relative humidity (RH) values (Figure 2). After the hygroscopic experiment, an SEM analysis of the sample was employed to primarily check particle types. This allowed us to further understand how PBAPs particles grow at different RH values ranging from 5% to 94%.

The scheme of the IPH system is shown in Figure 2, which consisted of four steps;

(1) Introducing N<sub>2</sub> gas with a mass flow controller into a chamber;

(2) Setting a TEM grid or silicon wafer on the bottom of an environmental microscopic cell (Gen-RH Mcell, UK), which can change the RH and maintain the temperature at 20 °C;

(3) Taking images at incremental RH values using an optical microscope (Olympus BX51M, Japan) with a camera (Canon 650D);

(4) Obtaining through the RADUS software the PBAPs sizes (i.e., D(RH) and D<sub>0</sub>) in the images taken from the optical microscopy manually or automatically.. The images can be taken at different RHs during hygroscopic experiments and then are input into the RADUS software for size measurement.

This IPH system has been tested and has successfully captured the hygroscopic growth of

individual aerosol particles collected on either a silicon wafer or TEM grid in our laboratory (Sun et al., 2018). Before the IPH system is used for ambient samples, it must be checked through standard NaCl particles on a silicon wafer made in the laboratory. Figure S3 shows that the delinquency relative humidity (DRH) of individual NaCl particles on this silicon wafer is at 76%, similar to the standard DRH at  $75 \pm 1\%$ . After the procedure, we can replace our collected samples into the IPH system.

The particle growth factor (GF), an important parameter used to describe the hygroscopic growth of individual particles, is defined as follows:

$$GF(RH) = \frac{D(RH)}{D_0}$$

where  $D(RH)$  and  $D_0$  are the diameters of particles at a given RH and at 5% RH, respectively.

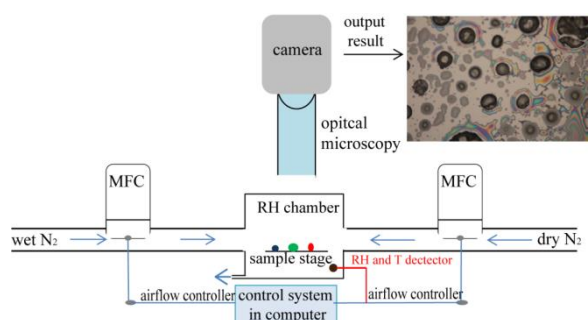

**Figure 2** Scheme of a custom-made individual particle hygroscopic system to observe hygroscopic growth of individual particles

## 2.5 Meteorological data and back trajectories

Meteorological data, including the relative humidity (RH), temperature, wind speed, and wind direction, were measured and recorded every 5 min by an automated weather meter (Kestrel 5500, USA). During the sampling period, the relative humidity (RH) and temperature varied from 40-70% and 22-28 °C during the day and 90-100% and 10-15 °C during the night,



respectively. The wind speed was 1.5-7.6 m s<sup>-1</sup> during the day and 0-1 m s<sup>-1</sup> at night (Figure S4).

To determine the regional transport of air masses, 6-h back trajectories of air masses were generated using a Hybrid Single Particle Lagrangian Integrated Trajectory (HYSPLIT) model at the forest sampling station during 14-21 August, 2016. Based on the sampling times of each day at 09:00, 15:00, 21:00, and 02:00 (midnight) local time, we performed 31 air mass back trajectories. Here we selected an altitude of 500 m as the end point of each back trajectory (Figure 1). Figure 1 shows that all the back trajectories in the past 6-h had been transported over the Lesser Khingan Mountain forest.

### 3. Results and Discussion

#### 3.1 Morphology and elemental composition of PBAPs

Among the 4,122 analyzed aerosol particles with diameters of 100 nm-10  $\mu$ m analyzed by TEM/EDS, individual particles are classified into five groups based on their morphology and composition: S-OM (mixture of sulfate (S), organics (OM)), OM, mineral dust, and PBAPs (Figure 3). S can be used to indicate secondary sulfates; abundant C and minor O with transparent color constitute the coating of the sulfate core and represent secondary organic matter; and irregular particles containing Si, Al, Ca, minor Fe, and Ti normally indicate mineral dust particles. Moreover, previous studies have found that elemental P in individual particles and their associated unique morphologies can be used to identify PBAPs by electron microscopy (Poschl, 2005; Wittmaack et al., 2005). Thirteen percent of particles were PBAPs, and low magnification TEM and SEM images both revealed that abundant PBAPs occurred in the samples (e.g., Figure 3a-b).

The number fractions of size-resolved aerosol particles show that secondary S-OM and OM particles were the dominant particle groups in the fine mode ( $< 1 \mu\text{m}$ ) while PBAPs and mineral particles dominated the coarse mode ( $\geq 1 \mu\text{m}$ ) (Figure 4a). Moreover, we noticed that the number fractions of PBAPs in each sample collected at night were much higher than those collected during the day. Abundant fine secondary sulfate and organic particles from photochemical formation were observed during the day. Figure 4b shows that the average number fraction of PBAPs was 2.5% in the samples collected during the day and as high as 30.0% at night. If we further calculated the number concentration of PBAPs in Figure 4b, the PBAPs concentration significantly increased by approximately seven times from daytime to nighttime, although the non-PBAPs concentration decreased.

Based on the morphology and size of the PBAPs, we definitely identified fungal spores and brochosomes, and plant or insect debris, all of which have been widely reported before (Wittmaack et al., 2005; Huffman et al., 2012; Afanou et al., 2014; Valsan et al., 2015; Priyamvada et al., 2017). Besides these PBAPs, we also found many special rod-like PBAPs with a dominant size range of 1 - 5  $\mu\text{m}$ . Pollen was not found in our samples, which may be because large pollen emissions occur in spring and early summer instead of late summer (August) in boreal forests (Manninen et al., 2014).

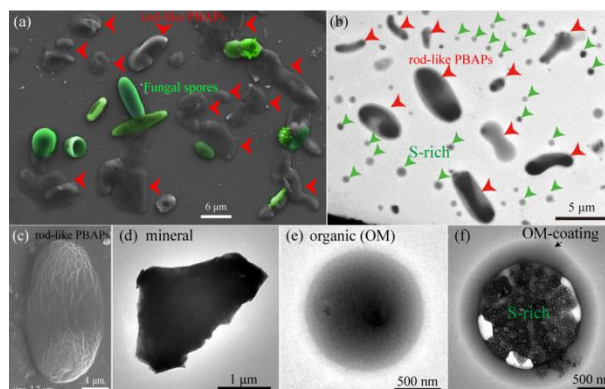

**Figure 3** Low magnification SEM and TEM images of individual particles collected from the forest air.

(a) low magnification SEM image of rod-like PBAPs (red arrows) and fungal spores (green); (b) low magnification TEM image of rod-like PBAPs particles and secondary sulfate (S-rich) particles; (c) SEM image of a rod-like particle; (d) TEM image of a mineral dust particle (e) TEM image of an organic matter (OM) particle; and (f) TEM image of OM coating on S-rich particles. The color in (a) was artificially painted on the original SEM images.

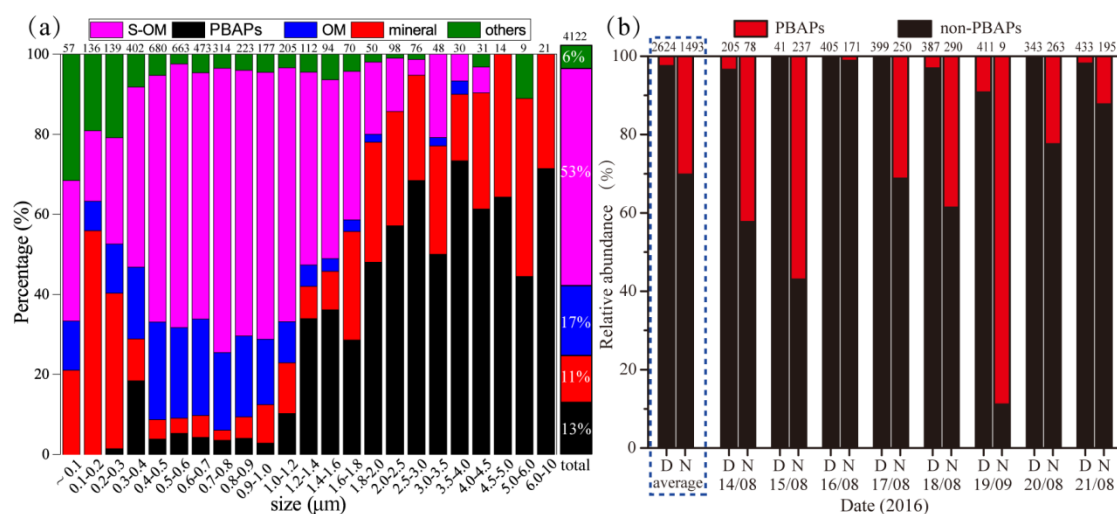

**Figure 4** Number fractions of different types of particles in different size bins and their total number fraction (a); and number fractions of primary biological aerosol particles (PBAPs) and non-PBAPs during the day and night (b). The number of analyzed particles is listed above each column. D and N are daytime and nighttime.

Online instruments indicate that large number of fine PBAPs are bacteria and fungi in the forest air (Tong and Lighthart, 2000;Elbert et al., 2007;Huffman et al., 2010;Despr és et al., 2012;Hu et al., 2018). Although many previous studies reported PBAPs through the SEM, no observations of fine bacteria and fungal particles in forest air were reported (Wittmaack et al., 2005;Shi et al., 2009;Martin et al., 2010;Huffman et al., 2012;Tamer Vestlund et al., 2014;Valsan et al., 2015;Valsan et al., 2016;Priyamvada et al., 2017;Wu et al., 2019). Posfai et al. (2003) found a few rod-like

bacterial particles in marine air using TEM. In this study, we found that the rod-like PBAPs (Figure 5a-e) have a morphology similar to bacteria reported by Posfai et al. (2003). These rod-like PBAPs were stable under the electron beam during the TEM analysis, and they contained C, N, O, P, and K with minor Mg, Si, S, Ca and Fe (Figure 5a). These rod-like PBAPs have a size range of 300 nm-7  $\mu\text{m}$  with the dominant size range of 1-5  $\mu\text{m}$  with two typical peaks at 1.4  $\mu\text{m}$  and 3.5  $\mu\text{m}$  (Figure 6a). Figure 6b further shows that the aspect ratio of 85% of these particles is larger than 1.5.

In nature, many fine fungi normally displayed similar composition and rod-like shape. To better compare and confirm differences of bacteria and fungi observed in TEM, we cultured *Colibacillus* and *Yeast* in the laboratory to represent bacteria and fungi. Then we sprayed the solution of *Colibacillus* and *Yeast* onto TEM grids. After drying these samples, we observed the morphology and size of *Colibacillus* and *Yeast* through the TEM (Figure 5f-g and Figure S5). Indeed, TEM/EDS show very similar rod-like shape and composition between *Colibacillus* and *Yeast* particles on the substrate, although the *Yeast* particles with a size range at 1-8  $\mu\text{m}$  with a mean diameter at 4.3  $\mu\text{m}$  are larger than *Colibacillus* (300 nm-2.5  $\mu\text{m}$  with mean diameter of 1.3  $\mu\text{m}$ ) (Figure S5). It is interesting that the size distribution of the rod-like PBAPs collected in the forest air displays two typical peaks at 1.4  $\mu\text{m}$  and 3.5  $\mu\text{m}$ , which probably represent bacteria and fungi. Despr  s et al. (2012) stated that bacteria mostly have diameters of 1-2  $\mu\text{m}$  and fungi of 1–10  $\mu\text{m}$  in the atmosphere. Although we can indicate the bacteria and fungi based on their sizes, the clue could not be used to precisely identify bacteria and fungi through electron microscopy due to their overlapped size range. Figure 6b shows 85% of particles with larger aspect ratios ( $> 1.5$ ), suggesting most of these PBAPs particles have typical rod-like shape. Although their identification is tentative, we called all these similar rod-like bacteria and fungal particles “rod-like PBAPs” here.

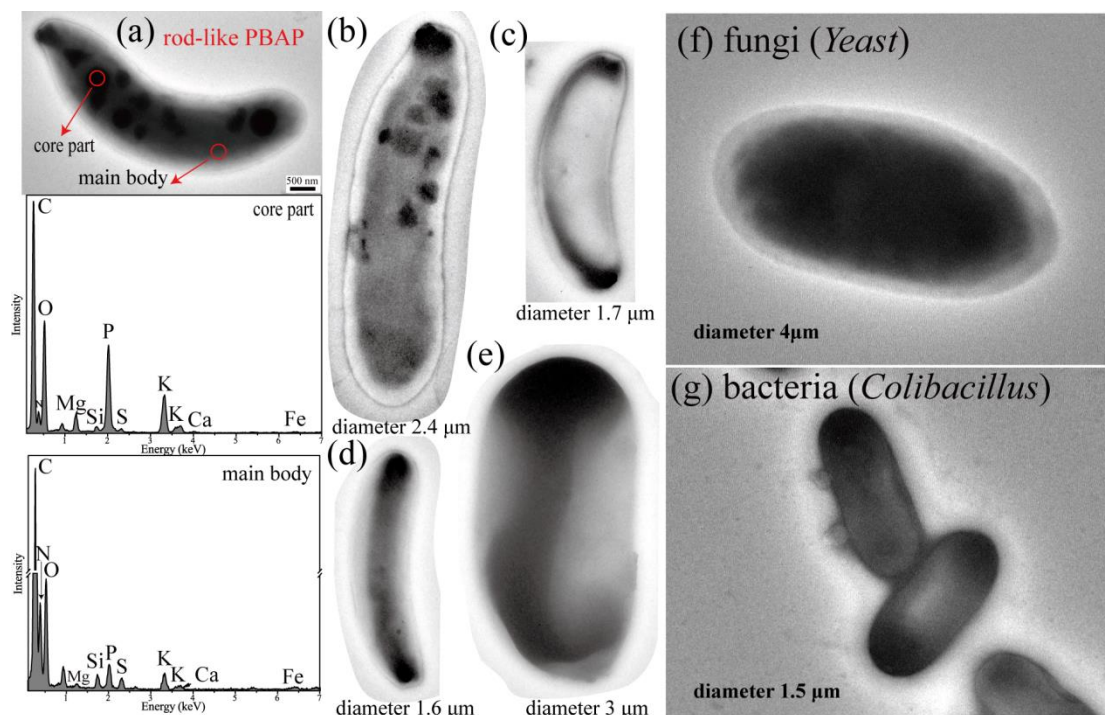

Figure 5 TEM image of the rod-like PBAPs collected in forest air and the fungi and bacteria cultivated in laboratory. (a) Morphology of a rod-like PBAP and EDS spectra of its core and main part. The red circles indicate where EDS impacted the rod-like PBAP. (b-e) Various rod-like PBAPs collected in forest air. (f) One *Yeast* particle cultivated in laboratory (e) One *colibacillus* particle cultivated in laboratory.

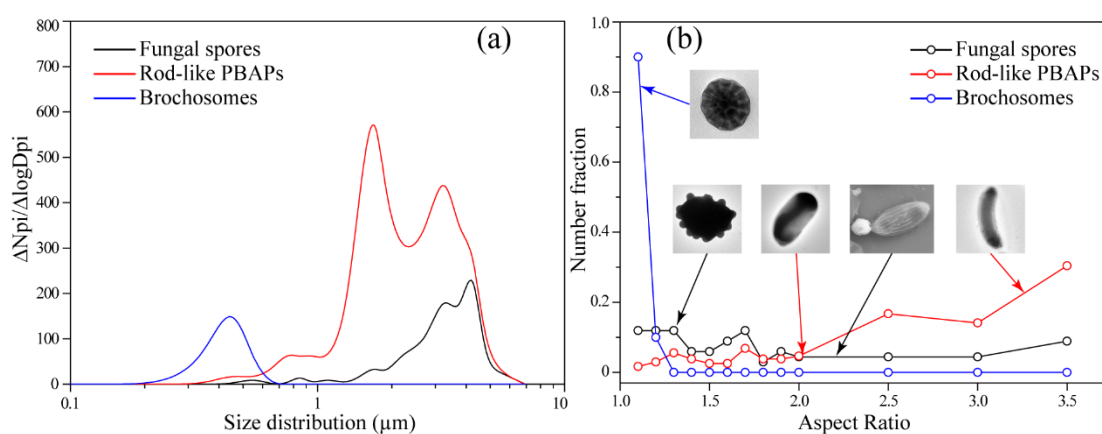

Figure 6 Size distribution and aspect ratios of rod-like PBAPs, fungal spores, and brochosomes collected in boreal forest air.

Fungal spores are microscopic biological particles that allow fungi to reproduce, serving a similar purpose to that of seeds in the plant world (Lacey and West, 2006). Spores can be released as a part of the sexual and/or asexual morph (stage) of the lifecycle of a fungus, and many species are able to produce spores from both stages (Després et al., 2012). Fungal spores have been reported in many places in the global air and their morphologies have been well documented (Shi et al., 2003; Wittmaack et al., 2005; Coz et al., 2009; Shi et al., 2009; Martin et al., 2010; Huffman et al., 2012; Tamer Vestlund et al., 2014; Afanou et al., 2015; Valsan et al., 2015; Valsan et al., 2016; Priyamvada et al., 2017; Wu et al., 2019). In this study, the fungal spores generally appeared as ovoid (Figure 7a), sub-globular (Figure 7b-c) or elongated shapes with a smooth surface and small protuberances (apiculus) (Figures 8a-f). Figure 7d shows that their composition mainly consists of C, O and Si, followed by minor N, Mg, P, S, K and Fe. The size range of the observed fungal spores varied roughly between 400 nm and 7 µm (Figure 6a). The size distribution of fungal spores further showed a dominant size range of 2 - 5 µm and one peak at 4 µm. The number fraction of fungal spores at all aspect ratios is generally lower than 0.15, suggesting that there is no typical shape from either roundness or elongation for fungal spores in the boreal forest. SEM images clearly display that several typical fungal spores with diameters of 3.7-6.5 µm do not have well-defined shapes and that their surfaces have regular strips or regular protuberances (Figure 8). Similar fungal spores have been reported in forest air (Wittmaack et al., 2005; Valsan et al., 2015). Compared with the rod-like PBAPs, fungal spores normally have a rougher surface (Figures 6-7), larger size, and much higher Si and lower N. Therefore, the fungal spores can easily be identified based on their morphology among the PBAPs through the TEM and SEM analysis.

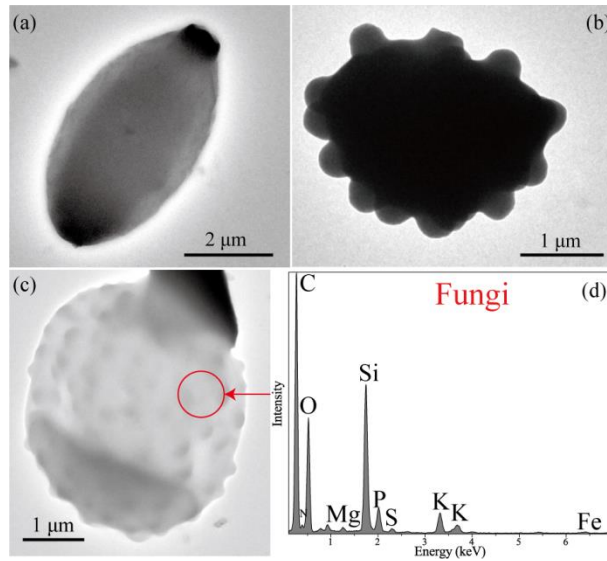

**Figure 7** TEM/EDS showing the morphology and composition of various fungal spores. (a) a spindle fungal spore; (b) a fungal spore with protuberances; (c) a fungal spore with protuberances; and (d) EDS spectrum showing the composition of fungal spore. The red circle indicates where EDS impacted the particle.



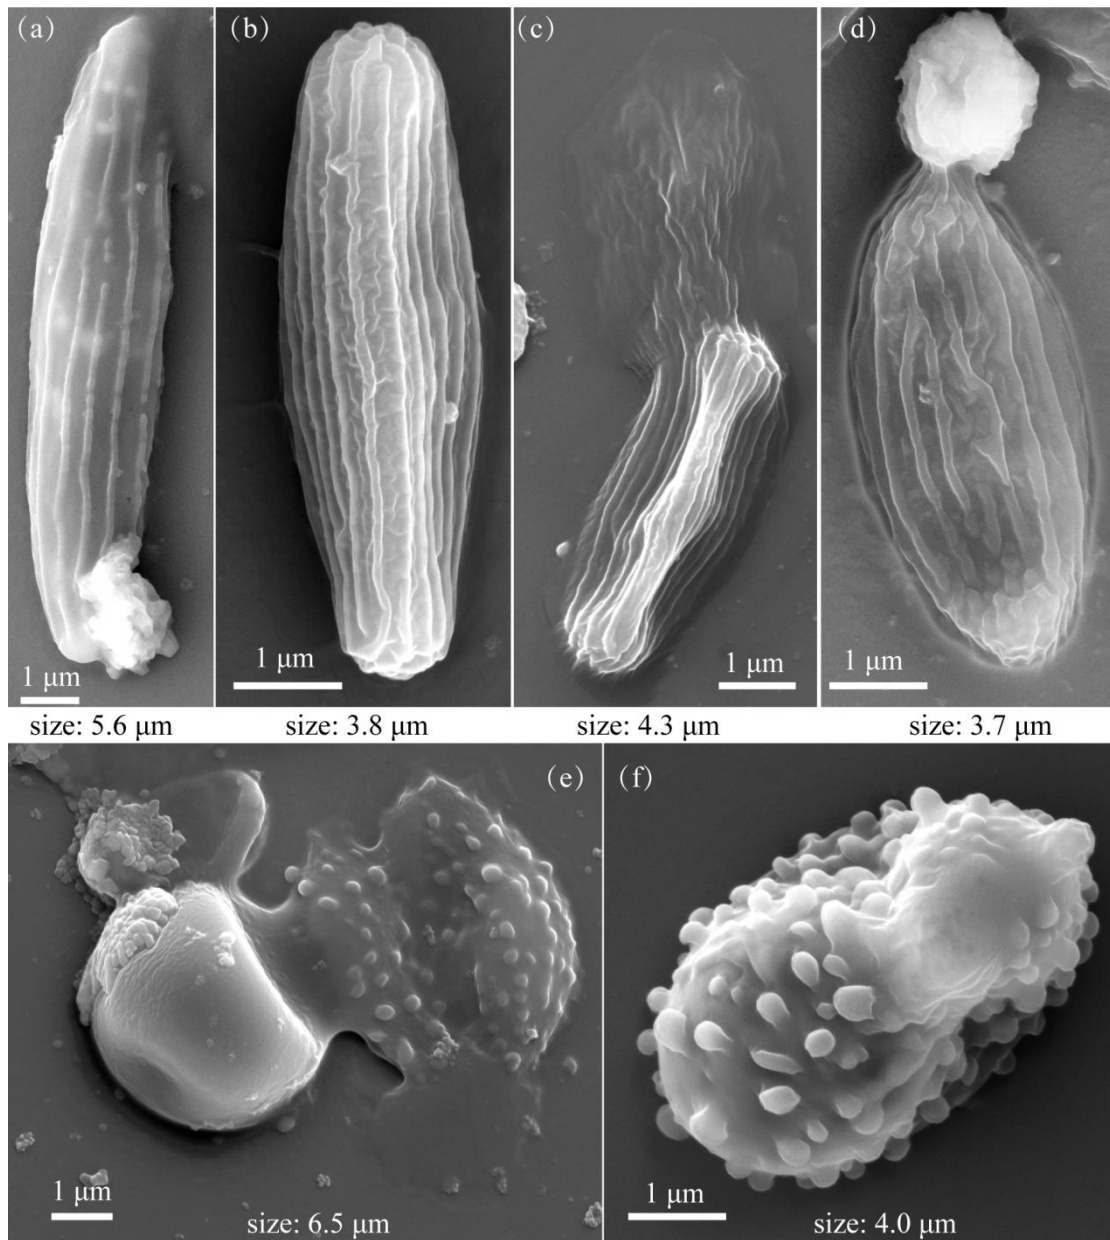

**Figure 8** SEM images showing the shape, size, and surface properties of fungal spores. Size represents the diameter of fungal spores. (a-d) Surfaces of three spindle fungal particles with a layer of strips. (e-f) Surfaces of two fungal spores with protuberances.

Brochosomes are hollow spherical particles produced by leafhoppers (Cicadelliae) (Wittmaack, 2005). TEM and SEM observations both found abundant brochosomes in the samples. The low-magnification SEM images showed that there are large brochosomal clusters on the substrate, each containing tens or hundreds of single brochosomes (Figure S6). Wittmaack (2005)



found that most of the brochosomes normally occur as large clusters and reported that each cluster contains up to 100,000 brochosomes. In this study, TEM and SEM both produce clear images showing the structure of the brochosome (Figures 9-10). Interestingly, the outline of each brochosome approximates a truncated icosahedron and the brochosome particles likely have unique inner structures, such as C60 Buckminster fullerenes (Figures 9a-b and 10). Compared with the rod-like PBAPs, chemical composition of the brochosomal particles show extremely high Si and low P in addition to major C and O and minor N, Na, S, K and Fe (Figure 9c). A single brochosome has a size range of 200-700 nm with a mean diameter of 350 nm. The aspect ratio of individual brochosomes is close to 1, suggesting that they are spherical (Figure 6b). Because the brochosomes might be dispersed from their clusters when they impact on the substrate, it is not meaningful to compare the number fraction of brochosomes with the rod-like PBAPs and fungal spores.

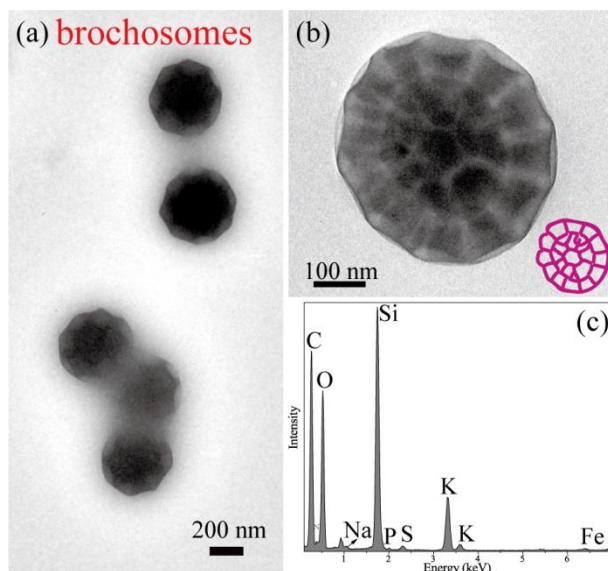

**Figure 9** TEM images of brochosomes and the composition of (a) a single brochosome and brochosome aggregations; (b) high-resolution TEM image showing the inner structure of one brochosome; (c) EDS spectrum showing the chemical composition of the brochosomes.

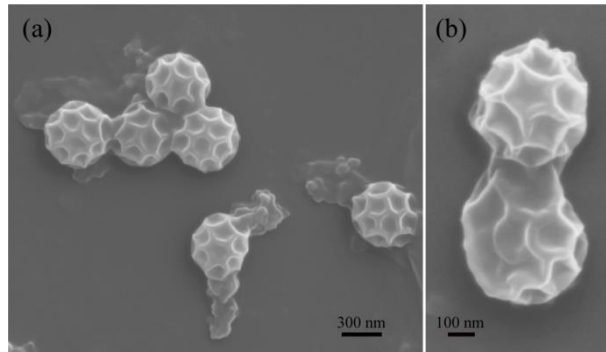

**Figure 10** SEM images of brochosomes. (a) Single brochosome and their aggregations. Some brochosomal particles are associated with primary biological species. (b) High-resolution SEM image showing the surface properties of the brochosomal particles.

The TEM and SEM images both show a few elongated large particles at 8-20  $\mu\text{m}$  among the biological particles. EDS shows that these particles mainly contained C, O, and Si but no detectable P in some of these biological particles as shown in Figures 11-12. We speculate that these biological particles were plant or insect debris. For example, Wittmaack et al. (2005) suggested that the spaghetti-type biological particles from Figure 11a-d are likely epicuticular wax fragments of plants. The SEM images as shown in Figure 12 clearly displayed the surface morphology of the large particles.

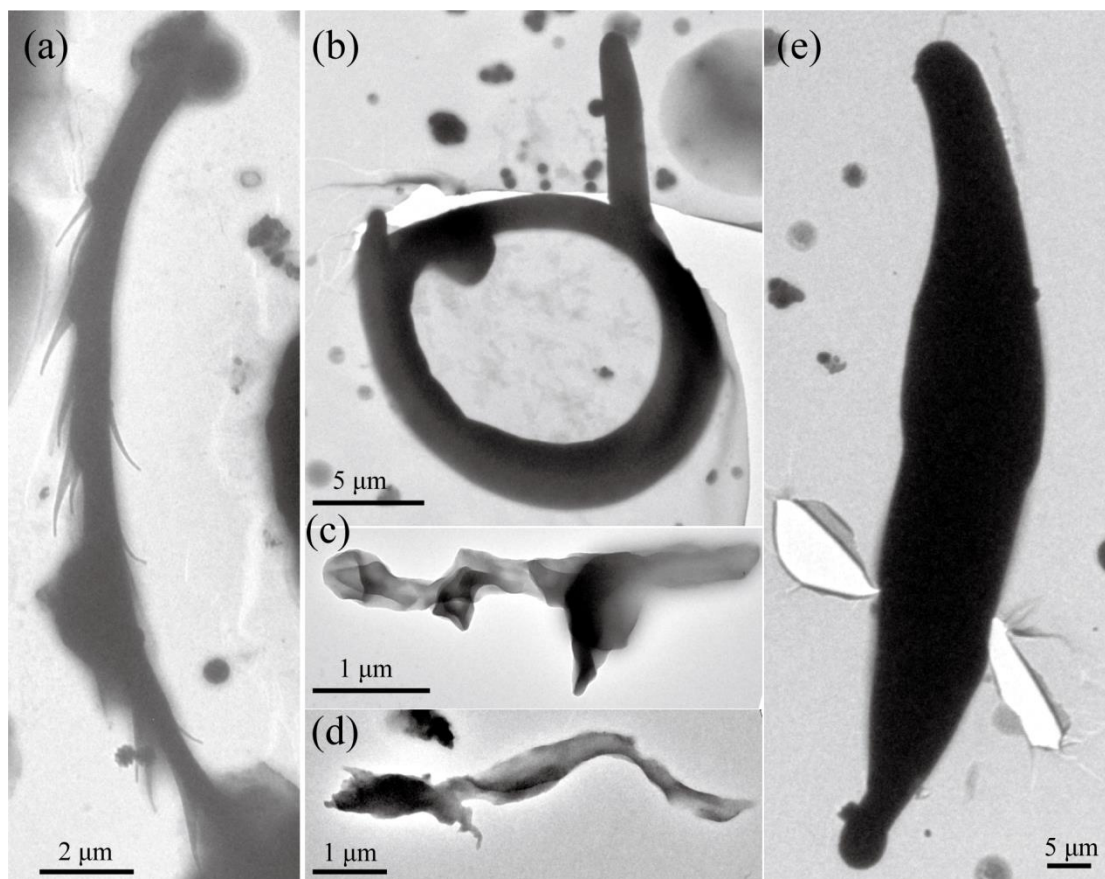

**Figure 11** TEM images showing the morphology of the primary biological particles. (a) One elongated particle with thorns; (b) one circular particle; (c-d) two elongated particles; and (e) one long spindle particle

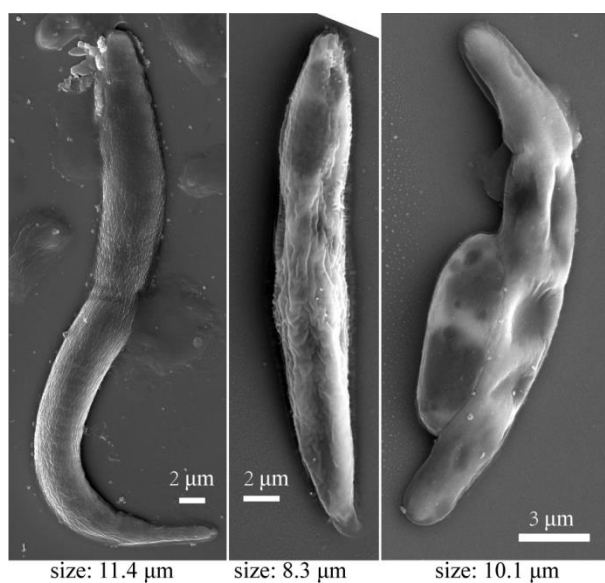

**Figure 12** SEM image showing the morphology and surface properties of three elongated biological

particles.

### 3.2 Relative abundance of PBAPs

In this study, we classified PBAPs but also efficiently obtained the number fraction of rod-like PBAPs and fungal spores in coarse mode particles ( $> 1 \mu\text{m}$ ). The results from the electron microscopy analysis further estimated that PBAPs, mineral dust, and the remaining particles accounted for 50%, 25%, and 25% of the coarse mode, respectively. Assuming a density of  $\sim 1 \text{ g cm}^{-3}$  for PBAPs (Elbert et al., 2007),  $2 \text{ g cm}^{-3}$  for mineral dust particles, and  $1.4 \text{ g cm}^{-3}$  for the remaining particles (e.g., S-OM, OM, and metal) (Rissler et al., 2006), mass concentrations of the three different types of particles with different size bins can be estimated based on the equation:

$$M_i = \frac{\pi}{6} D_i^3 \rho_i N_i$$

$i$ : particle type (PBAPs, mineral dust, and other remaining particle)

$D$ : particle geometrical diameter in a size bin

$N$ : particle number in a size bin

$M$ : total mass of the analyzed particles in a size bin

$\rho$ : particle density ( $\text{g cm}^{-3}$ )

In the equation,  $N_i$  and  $D_i$  both can be obtained through the measurement of individual particles in TEM images. Finally, we estimated that the mass concentration of PBAPs, mineral dust, and remaining particles accounted for 47%, 43%, and 10% of  $\text{PM}_{2.5-10}$ , respectively. The results suggest that PBAPs significantly contributed to mass concentration of  $\text{PM}_{2.5-10}$  in summertime in the boreal forest air. During the sampling period, we measured the daily mass concentrations of  $\text{PM}_{2.5}$  of  $\sim 6.0 \mu\text{g m}^{-3}$  and  $\text{PM}_{10}$  of  $\sim 10.0 \mu\text{g m}^{-3}$ . The number size distribution of PBAPs coupled with the mass concentrations of  $\text{PM}_{2.5}$  and  $\text{PM}_{10}$  were used to estimate the total mass concentration of PBAPs

using the result from the above equation. We estimated that the PBAPs contributed  $\sim 1.9 \mu\text{g m}^{-3}$  to the concentration of  $\text{PM}_{2.5-10}$  of  $4.0 \mu\text{g m}^{-3}$ .

Thirteen percent of all detected particles **by number** collected from the boreal forest air are PBAPs. Such a high fraction of PBAPs has not been reported in urban and rural air in China (Shi et al., 2003; Shi et al., 2009; Li et al., 2016). We noticed that the number concentration of PBAPs was much higher at night than during the day (Figure 3b). A shallow nocturnal boundary layer can lead to a **slight** increase in the number concentration of coarse particles near the ground (Graham et al., 2003), **but** this increase cannot explain the large difference in the relative number fraction of PBAPs (12 times larger at night than during the day) (Figure 3b). Alternately, the relative emission strength of PBAPs **from the forest between day and night likely induced the difference of the relative number fractions.**

It is well documented that meteorological conditions such as RH, wind speed, and temperature can affect PBAPs emission in the forests (Harrison et al., 2005; Whitehead et al., 2016). **In particular, the wind speed is especially important in promoting PBAPs emission into air. During the sampling period, the average wind speeds at 5 min intervals had a range from 0 to 7.5 m/s with a mean value of 0.75 m/s. 89% of the measured wind speeds were lower than 2 m/s (Figure S4). Therefore, we conclude that no large consistent wind speeds occurred during the sampling period. Furthermore, we compared all the air mass back trajectories in the past 6-h over the Lesser Khingan Mountain forest at each sampling time (Figure 1). There are similar lengths of these back trajectories, suggesting that wind speeds above the forest canopy had only small changes during the sampling period. Therefore, the result from the ground-based measurements of wind speeds is consistent with air mass back trajectories. Here, we can exclude wind speeds during the sampling period as one**

important factor to dominate PBAPs emissions during day and night in the boreal forest. High temperatures normally increase the PBAPs emissions from the plants in the daytime (Harrison et al., 2005). However, we observed contrasting results that more PBAPs occurred in nighttime instead of daytime (Figure S4). Therefore, we also exclude temperatures during the sampling period as a cause of the vastly different PBAPs emissions at day and night in the boreal forest.

Besides wind speed and temperature, RH is an important meteorological variable that influences PBAPs emissions from plants (Harrison et al., 2005; Huffman et al., 2012). In this study, we found large differences of RH between day and night (Figure S4). The elevated RH near 100% at night (Figure S1) appears to be an important factor that increases the emissions of PBAPs. This result is consistent with the conclusion of Elbert et al. (2007), who showed that PBAPs in a boreal forest are generally most abundant in samples collected at night when the RH is close to 100%. A similar phenomenon has been observed in different forests, such as the Amazon rainforest (Huffman et al., 2012; Whitehead et al., 2016), a montane ponderosa pine forest in North American (Crawford et al., 2014), a semi-arid forest in the southern Rocky Mountains of Colorado (Gosselin et al., 2016), and a semi-rural site in southwestern Germany (Toprak and Schnaiter, 2013). These studies above found that a nighttime peak of number concentrations of fluorescent biological aerosol particles is consistent with nocturnal sporulation driven by the increased RH. Moreover, Troutt and Levetin (2001) explained that the increase in PBAP concentrations is caused by the increase in basidiospores concentrations with RH, and they showed that a clear diurnal rhythm occurs and peaks at 04:00-06:00 LT. Furthermore, the number ratio (4.6 at nighttime and 4.0 at daytime) of rod-like PBAPs vs fungal spores and their number concentrations increased from daytime to nighttime (Figure S7). These results all suggest that higher RH can promote the emissions of rod-like PBAPs

and fungal spores in the boreal forest.

### 3.3 Mixing state of rod-like PBAPs

Our study shows that rod-like PBAPs contain bacteria and fungi in the boreal forest air. Although approximately 80% of rod-like PBAPs were externally mixed particles in the boreal forest air, we still found that 20% of rod-like PBAPs were internally mixed particles. TEM observations show that the rod-like PBAPs were frequently internally mixed with mineral, metal, organics, and inorganic salts. We noticed that irregular mineral dust particles significantly changed the shape of the rod-like PBAPs (Figure 13a-c). The EDS analysis shows that the internally mixed mineral particles contain certain amounts of C, O, and P in addition to Si, Al, or Ca (Figure 13a-c), suggesting that many rod-like PBAPs were associated with mineral dust particles.

In this study, we found that some nanoscale metal particles were internally mixed with rod-like PBAPs. Figure 13d-f further shows that these metals were spherical and contained Mn, Si and/or Fe. As in previous studies, these nanosize metal particles were emitted from industrial activities or power plants instead of natural soil (Li et al., 2017). TEM observations show that these metallic particles were mainly attached to the surface of rod-like PBAPs. Moreover, some rod-like PBAPs were coated by inorganic salts (e.g., K-P in Figure 13g and S-rich in Figure 13i) and organics. The shape of the rod-like PBAPs might change following the aging process during long-range transport (Figure 13), although the elemental P or its associated ionic components ( $\text{H}_2\text{PO}_4^-$  and  $\text{PO}_3^-$ ) did not change (Pratt et al., 2009). Pratt et al. (2009) detected  $\text{H}_2\text{PO}_4^-$  and  $\text{PO}_3^-$  in individual cloud ice-crystal residues to identify PBAPs using aerosol time-of-flight mass spectrometry. Although one study indicates that a few mineral dust or fly ash particles contain trace inorganic P, these particles



do not contain abundant organics and their number is low in the air (Zawadowicz et al., 2017).

Therefore, TEM/EDS is an efficient tool to identify fine bacteria or fungi from non-PBAPs collected in the atmosphere. Moreover, it significantly reveals the mixing state of individual PBAPs, a key to understand their possible CCN and IN activity over the boreal forest air in the future.

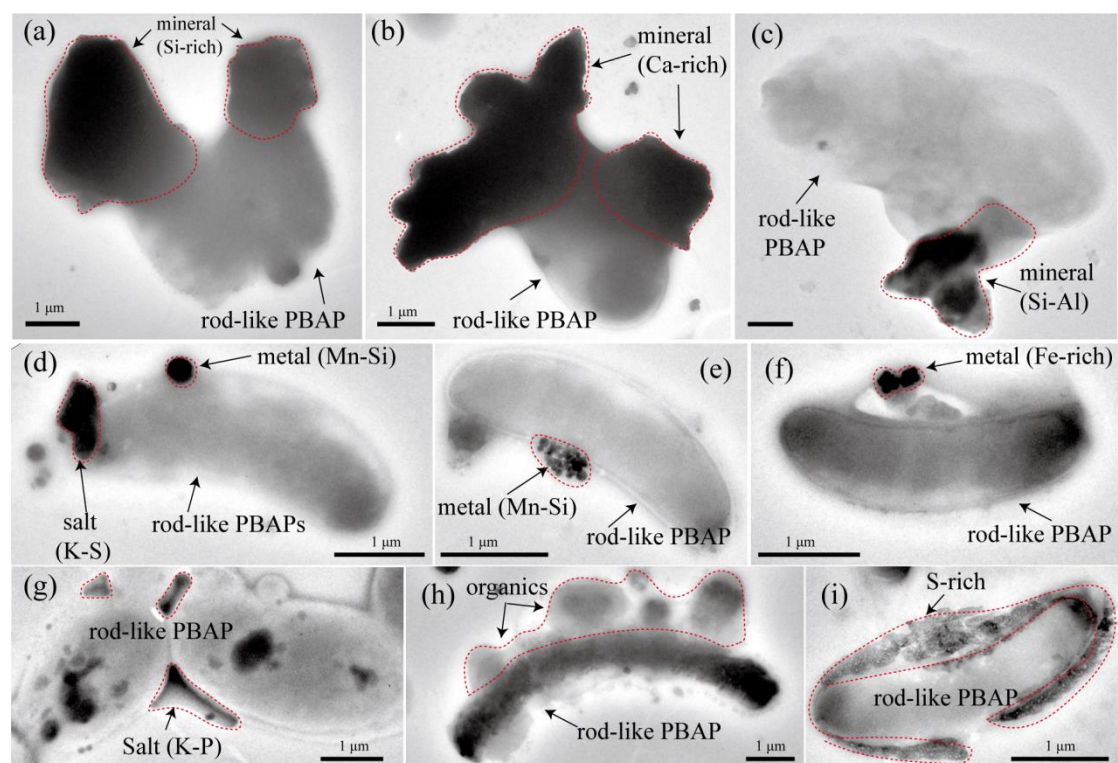

**Figure 13** TEM showing the internally mixed rod-like PBAPs. (a-c) Internal mixture of mineral and rod-like PBAP; (d-f) Internal mixture of metal and rod-like PBAP; (g) Internal mixture of inorganic salts and rod-like PBAP; (h) Internal mixture of organics and rod-like PBAP; and (i) Internal mixture of S-rich salts and rod-like PBAP.

### 3.4 Hygroscopicity of PBAPs

In this study, we conducted an experiment to observe the hygroscopic growth of fresh PBAPs. In the hygroscopic experiment, the PBAPs all take up water and grow by up to 88% during hydration, and they lose water and return to the dry particle size (reduction of 83%) during dehydration (Figure



14). The growth factor of the PBAPs is ~1.09 at RH=94% based on the particle diameter change, which is much lower than growth factor of NaCl at ~2.3 (Figure 14). These results show that the fresh PBAPs have extremely weak hygroscopicity.

Recent studies found that fungal fragments collected in Amazon forests displayed strong hygroscopic properties (China et al., 2016; China et al., 2018) and were internally mixed with certain amounts of sodium salts. However, we found weak hygroscopic growth of 1.09, whereas this value was in the range of 1.05-1.3 for bacteria and fungal spores in previous studies (Reponen et al., 1996; Lee et al., 2002). However, the result is much lower than the value of 2.30 at RH=94% for NaCl (Figure 2a) and 1.60 at RH 94% for ammonium sulfate (Sun et al., 2018). This comparison suggests that fresh PBAPs display extremely weak hygroscopicity and do not contain any sodium salt in the boreal forest (Figure 2a). Overall, our results indicate that PBAPs from the substantial biological emissions from the Khingan Mountain boreal forest are weakly hygroscopic in nature.

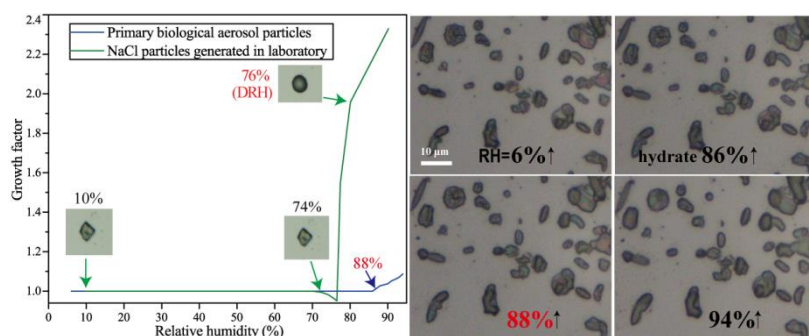

**Figure 14** Hygroscopic growth of NaCl prepared in laboratory and primary biological particles collected in boreal forest air. The up arrows (i.e., RH) represent hydration.

#### 4. Conclusions

The TEM and SEM observations both showed that the morphology of PBAPs were unique; they differed markedly from that of the sulfate, mineral, soot, organics, and metal particles in

continental air. Our results indicate that significant amounts of PBAPs are emitted from the Khingan Mountain area. In this study, we establish detailed information that includes the morphology, size, and composition of rod-like PBAPs, fungal spores, and brochosomes. C, N, O, P, K, and Si were detected in most of the PBAPs, and P represented a major marker to discriminate the PBAPs and non-PBAPs. We found that one type of PBAPs mostly appeared as similar rod-like shapes with an aspect ratio > 1.5 and the dominant sizes ranged from 1  $\mu\text{m}$  to 5  $\mu\text{m}$ . The size distribution of the rod-like PBAPs displays two typical peaks at 1.4  $\mu\text{m}$  and 3.5  $\mu\text{m}$ , which likely represent bacteria and fungal particles in the forest air. However, our study shows that there was no clear boundary between bacteria and some fungi from their size because of their size range partly overlapped.

The second most plentiful PBAPs were identified as fungal spores with ovoid, sub-globular or elongated shapes with a smooth surface and small protuberances (apiculus) with size at 400 nm - 7  $\mu\text{m}$  with a mean diameter of 4  $\mu\text{m}$ . Moreover, we found some large brochosomal clusters containing hundreds of brochosomes which have sizes from 200-700 nm and shapes like truncated icosahedrons. We estimated that the mass concentration of PBAPs, mineral dust, and remaining particles accounted for 47%, 43%, and 10% of the  $\text{PM}_{2.5-10}$  mass concentration, respectively, indicating that large boreal forests might represent a major source of PBAPs in the atmosphere. Moreover, there is a higher frequency and concentration of PBAPs at night compared with day. This difference could not be explained by wind speed or temperature, but was explicable by RH, which appears to be critical in enhancing PBAPs emissions from plants at night. The hygroscopic experiment shows that the primary bacterial and fungal particles show weak hygroscopicity.

**Author Contributions:** WL designed the study. WL, LL, QY, LX, and HY collected aerosol particles. WL, QL, LL, LX, YZ, BW, XD, and JZ contributed laboratory experiments and data analysis. WL prepared the manuscript with contributions from all the coauthors. BW, DH, DL, WH, DZ, PF, MY, MH, XZ, and ZS commented and edited the paper.

**Competing interests:** The authors declare no competing financial interests

## **Acknowledgments**

We appreciate Peter Hyde's comments and proofreading. We appreciate Min Yue and Jiachang Lian (Zhejiang Univ.) providing the *Yeast* and *Colibacillus* cultures. Huijun Xie (Shandong Univ.) is thanked for discussions. This work was funded by the National Natural Science Foundation of China (9184430003, 41622504 and 41575116), Zhejiang Provincial Natural Science Foundation of China (LZ19D050001), and Zhejiang University Education Foundation Global Partnership Fund. All the data are presented in the paper.

## References:

- Afanou, K. A., Straumfors, A., Skogstad, A., Nilsen, T., Synnes, O., Skaar, I., Hjeljord, L., Tronsmo, A., Green, B. J., and Eduard, W.: Submicronic Fungal Bioaerosols: High-Resolution Microscopic Characterization and Quantification, *Appl. Environ. Microb.*, 80, 7122-7130, 10.1128/aem.01740-14, 2014.
- Afanou, K. A., Straumfors, A., Skogstad, A., Skaar, I., Hjeljord, L., Skare, Ø., Green, B. J., Tronsmo, A., and Eduard, W.: Profile and Morphology of Fungal Aerosols Characterized by Field Emission Scanning Electron Microscopy (FESEM), *Aerosol Sci. and Tech.*, 49, 423-435, 10.1080/02786826.2015.1040486, 2015.
- Amato, P., Ménéger, M., Sancelme, M., Laj, P., Mailhot, G., and Delort, A.-M.: Microbial population in cloud water at the Puy de Dôme: Implications for the chemistry of clouds, *Atmos. Environ.*, 39, 4143-4153, <https://doi.org/10.1016/j.atmosenv.2005.04.002>, 2005.
- Ault, A. P., and Axson, J. L.: Atmospheric Aerosol Chemistry: Spectroscopic and Microscopic Advances, *Anal. Chem.*, 89, 430-452, 10.1021/acs.analchem.6b04670, 2017.
- Bauer, H., Schueller, E., Weinke, G., Berger, A., Hitzenberger, R., Marr, I. L., and Puxbaum, H.: Significant contributions of fungal spores to the organic carbon and to the aerosol mass balance of the urban atmospheric aerosol, *Atmos. Environ.*, 42, 5542-5549, <https://doi.org/10.1016/j.atmosenv.2008.03.019>, 2008.
- Chen, H., and Yao, M.: A high-flow portable biological aerosol trap (HighBioTrap) for rapid microbial detection, *J. Aerosol Sci.*, 117, 212-223, <https://doi.org/10.1016/j.jaerosci.2017.11.012>, 2018.
- China, S., Wang, B., Weis, J., Rizzo, L., Brito, J., Cirino, G. G., Kovarik, L., Artaxo, P., Gilles, M. K., and Laskin, A.: Rupturing of Biological Spores As a Source of Secondary Particles in Amazonia, *Environ. Sci. Technol.*, 50, 12179-12186, 10.1021/acs.est.6b02896, 2016.
- China, S., Burrows, S. M., Wang, B., Harder, T. H., Weis, J., Tanarhte, M., Rizzo, L. V., Brito, J., Cirino, G. G., Ma, P.-L., Cliff, J., Artaxo, P., Gilles, M. K., and Laskin, A.: Fungal spores as a source of sodium salt particles in the Amazon basin, *Nat. Commun.*, 9, 4793, 10.1038/s41467-018-07066-4, 2018.
- Christner, B. C., Cai, R., Morris, C. E., McCarter, K. S., Foreman, C. M., Skidmore, M. L., Montross, S. N., and Sands, D. C.: Geographic, Seasonal, and Precipitation Chemistry Influence on the Abundance and Activity of Biological Ice Nucleators in Rain and Snow, *P. Natl. Acad. Sci.*, 105, 18854-18859, 2008.
- Coz, E., Gómez-Moreno, F. J., Pujadas, M., Casuccio, G. S., Lersch, T. L., and Art ñano, B.: Individual particle characteristics of North African dust under different long-range transport scenarios, *Atmos. Environ.*, 43, 1850-1863, 10.1016/j.atmosenv.2008.12.045, 2009.
- Coz, E., Art ñano, B., Clark, L. M., Hernandez, M., Robinson, A. L., Casuccio, G. S., Lersch, T. L., and Pandis, S. N.: Characterization of fine primary biogenic organic aerosol in an urban area in the northeastern United States, *Atmos. Environ.*, 44, 3952-3962, <https://doi.org/10.1016/j.atmosenv.2010.07.007>, 2010.
- Crawford, I., Robinson, N. H., Flynn, M. J., Foot, V. E., Gallagher, M. W., Huffman, J. A., Stanley, W. R., and Kaye, P. H.: Characterisation of bioaerosol emissions from a Colorado pine forest: results from the BEACHON-RoMBAS experiment, *Atmos. Chem. Phys.*, 14, 8559-8578, 10.5194/acp-14-8559-2014, 2014.
- Crawford, I., Ruske, S., Topping, D. O., and Gallagher, M. W.: Evaluation of hierarchical agglomerative cluster analysis methods for discrimination of primary biological aerosol, *Atmos. Meas. Tech.*, 8, 4979-4991, 10.5194/amt-8-4979-2015, 2015.
- Despr  s, V., Huffman, J. A., Burrows, S. M., Hoose, C., Safatov, A., Buryak, G., Fr  hlich-Nowoisky, J.,

613 Elbert, W., Andreae, M., Pöschl, U., and Jaenicke, R.: Primary biological aerosol particles in the  
 614 atmosphere: a review, *Tellus B*, 64, 15598, 10.3402/tellusb.v64i0.15598, 2012.  
 615 Elbert, W., Taylor, P. E., Andreae, M. O., and Pöschl, U.: Contribution of fungi to primary biogenic  
 616 aerosols in the atmosphere: wet and dry discharged spores, carbohydrates, and inorganic ions, *Atmos.*  
 617 *Chem. Phys.*, 7, 4569-4588, 10.5194/acp-7-4569-2007, 2007.  
 618 Fröhlich-Nowoisky, J., Pickersgill, D. A., Despré, V. R., and Pöschl, U.: High diversity of fungi in air  
 619 particulate matter, *P. Natl. Acad. Sci.*, 106, 12814-12819, 10.1073/pnas.0811003106, 2009.  
 620 Gabey, A. M., Gallagher, M. W., Whitehead, J., Dorsey, J. R., Kaye, P. H., and Stanley, W. R.:  
 621 Measurements and comparison of primary biological aerosol above and below a tropical forest canopy  
 622 using a dual channel fluorescence spectrometer, *Atmos. Chem. Phys.*, 10, 4453-4466, 10.5194/acp-10-  
 623 4453-2010, 2010.  
 624 Georgakopoulos, D. G., Despré, V., Fröhlich-Nowoisky, J., Psenner, R., Ariya, P. A., Pósfai, M., Ahern,  
 625 H. E., Moffett, B. F., and Hill, T. C. J.: Microbiology and atmospheric processes: biological, physical and  
 626 chemical characterization of aerosol particles, *Biogeosciences*, 6, 721-737, 10.5194/bg-6-721-2009,  
 627 2009.  
 628 Gosselin, M. I., Rathnayake, C. M., Crawford, I., Pöhlker, C., Fröhlich-Nowoisky, J., Schmer, B.,  
 629 Despré, V. R., Engling, G., Gallagher, M., Stone, E., Pöschl, U., and Huffman, J. A.: Fluorescent  
 630 bioaerosol particle, molecular tracer, and fungal spore concentrations during dry and rainy periods in a  
 631 semi-arid forest, *Atmos. Chem. Phys.*, 16, 15165-15184, 10.5194/acp-16-15165-2016, 2016.  
 632 Graham, B., Guyon, P., Maenhaut, W., Taylor, P. E., Ebert, M., Matthias-Maser, S., Mayol-Bracero, O.  
 633 L., Godoi, R. H. M., Artaxo, P., Meixner, F. X., Moura, M. A. L., Rocha, C. H. E. D. A., Grieken, R. V.,  
 634 Glover, M. M., Flagan, R. C., and Andreae, M. O.: Composition and diurnal variability of the natural  
 635 Amazonian aerosol, *J. Geophys. Res.*, 108, 4765, doi:10.1029/2003JD004049, 2003.  
 636 Harrison, R. M., Jones, A. M., Biggins, P. D. E., Pomeroy, N., Cox, C. S., Kidd, S. P., Hobman, J. L.,  
 637 Brown, N. L., and Beswick, A.: Climate factors influencing bacterial count in background air samples,  
 638 *Int. J. Biometeorol.* 49, 167-178, 10.1007/s00484-004-0225-3, 2005.  
 639 Hu, W., Murata, K., Fukuyama, S., Kawai, Y., Oka, E., Uematsu, M., and Zhang, D.: Concentration and  
 640 Viability of Airborne Bacteria Over the Kuroshio Extension Region in the Northwestern Pacific Ocean:  
 641 Data From Three Cruises, *J. Geophys. Res.*, 122, 12,892-812,905, 10.1002/2017JD027287, 2017.  
 642 Hu, W., Niu, H., Murata, K., Wu, Z., Hu, M., Kojima, T., and Zhang, D.: Bacteria in atmospheric waters:  
 643 Detection, characteristics and implications, *Atmos. Environ.*, 179, 201-221,  
 644 <https://doi.org/10.1016/j.atmosenv.2018.02.026>, 2018.  
 645 Huffman, J. A., Treutlein, B., and Pöschl, U.: Fluorescent biological aerosol particle concentrations and  
 646 size distributions measured with an Ultraviolet Aerodynamic Particle Sizer (UV-APS) in Central Europe,  
 647 *Atmos. Chem. Phys.*, 10, 3215-3233, 10.5194/acp-10-3215-2010, 2010.  
 648 Huffman, J. A., Sinha, B., Garland, R. M., Snee-Pollmann, A., Gunthe, S. S., Artaxo, P., Martin, S. T.,  
 649 Andreae, M. O., and Pöschl, U.: Size distributions and temporal variations of biological aerosol particles  
 650 in the Amazon rainforest characterized by microscopy and real-time UV-APS fluorescence techniques  
 651 during AMAZE-08, *Atmos. Chem. Phys.*, 12, 11997-12019, 10.5194/acp-12-11997-2012, 2012.  
 652 Huffman, J. A., Prenni, A. J., DeMott, P. J., Pöhlker, C., Mason, R. H., Robinson, N. H., Fröhlich-  
 653 Nowoisky, J., Tobo, Y., Despré, V. R., Garcia, E., Gochis, D. J., Harris, E., Müller-Germann, I., Ruzene,  
 654 C., Schmer, B., Sinha, B., Day, D. A., Andreae, M. O., Jimenez, J. L., Gallagher, M., Kreidenweis, S. M.,  
 655 Bertram, A. K., and Pöschl, U.: High concentrations of biological aerosol particles and ice nuclei during  
 656 and after rain, *Atmos. Chem. Phys.*, 13, 6151-6164, 10.5194/acp-13-6151-2013, 2013.

657 Lacey, M. E., and West, J. S.: The Air Spora: A Manual for Catching and Identifying Airborne Biological  
658 Particles, Springer: Dordrecht, The Netherlands, 2006.

659 Lee, B. U., Kim, S. H., and Kim, S. S.: Hygroscopic growth of *E. coli* and *B. subtilis* bioaerosols, *J.*  
660 *Aerosol Sci.*, 33, 1721-1723, [https://doi.org/10.1016/S0021-8502\(02\)00114-3](https://doi.org/10.1016/S0021-8502(02)00114-3), 2002.

661 Li, W., Shao, L., Zhang, D., Ro, C.-U., Hu, M., Bi, X., Geng, H., Matsuki, A., Niu, H., and Chen, J.: A  
662 review of single aerosol particle studies in the atmosphere of East Asia: morphology, mixing state, source,  
663 and heterogeneous reactions, *J. Clean. Prod.*, 112, Part 2, 1330-1349, 2016.

664 Li, W., Xu, L., Liu, X., Zhang, J., Lin, Y., Yao, X., Gao, H., Zhang, D., Chen, J., Wang, W., Harrison, R.  
665 M., Zhang, X., Shao, L., Fu, P., Nenes, A., and Shi, Z.: Air pollution–aerosol interactions produce more  
666 bioavailable iron for ocean ecosystems, *Sci. Adv.*, 3, e1601749, 2017.

667 Ling, M. L., Wex, H., Grawe, S., Jakobsson, J., L ndahl, J., Hartmann, S., Finster, K., Boesen, T., and  
668  antl-Temkiv, T.: Effects of Ice Nucleation Protein Repeat Number and Oligomerization Level on Ice  
669 Nucleation Activity, *J. Geophys. Res.*, 123, 1802-1810, 10.1002/2017JD027307, 2018.

670 M hler, O., DeMott, P. J., Vali, G., and Levin, Z.: Microbiology and atmospheric processes: the role of  
671 biological particles in cloud physics, *Biogeosciences*, 4, 1059-1071, 10.5194/bg-4-1059-2007, 2007.

672 Manninen, H. E., Back, J., Sihto-Nissila, S. L., Huffman, J. A., Pessi, A. M., Hiltunen, V., Aalto, P. P.,  
673 Hidalgo, P. J., Hari, P., Saarto, A., Kulmala, M., and Petaja, T.: Patterns in airborne pollen and other  
674 primary biological aerosol particles (PBAP), and their contribution to aerosol mass and number in a  
675 boreal forest, *Boreal Environ. Res.*, 19, 383-405, 2014.

676 Martin, S. T., Andreae, M. O., Artaxo, P., Baumgardner, D., Chen, Q., Goldstein, A. H., Guenther, A.,  
677 Heald, C. L., Mayol-Bracero, O. L., McMurry, P. H., Pauliquevis, T., Pochl, U., Prather, K. A., Roberts,  
678 G. C., Saleska, S. R., Silva Dias, M. A., Spracklen, D. V., Swietlicki, E., and Trebs, I.: Sources and  
679 properties of Amazonian aerosol particles, *Rev. Geophys.*, 48, RG2002, 10.1029/2008rg000280, 2010.

680 May, N. W., Olson, N. E., Panas, M., Axson, J. L., Tirella, P. S., Kirpes, R. M., Craig, R. L., Gunsch, M.  
681 J., China, S., Laskin, A., Ault, A. P., and Pratt, K. A.: Aerosol Emissions from Great Lakes Harmful  
682 Algal Blooms, *Environ. Sci. Technol.*, 52, 397-405, 10.1021/acs.est.7b03609, 2018.

683 Morris, C. E., Georgakopoulos, D. G., and Sands, D. C.: Ice nucleation active bacteria and their potential  
684 role in precipitation, *J. Phys. IV France*, 121, 87-103, 2004.

685 Morris, C. E., Conen, F., Alex Huffman, J., Phillips, V., P schl, U., and Sands, D. C.: Bioprecipitation: a  
686 feedback cycle linking Earth history, ecosystem dynamics and land use through biological ice nucleators  
687 in the atmosphere, *Global Change Biol.*, 20, 341-351, 10.1111/gcb.12447, 2014.

688 Nikkels, A. H., Terstegge, P., and Spieksma, F. T. M.: Ten types of microscopically identifiable airborne  
689 fungal spores at Leiden, The Netherlands, *Aerobiologia*, 12, 107, 10.1007/bf02446602, 1996.

690 Patterson, J. P., Collins, D. B., Michaud, J. M., Axson, J. L., Sultana, C. M., Moser, T., Dommer, A. C.,  
691 Conner, J., Grassian, V. H., Stokes, M. D., Deane, G. B., Evans, J. E., Burkart, M. D., Prather, K. A., and  
692 Gianneschi, N. C.: Sea Spray Aerosol Structure and Composition Using Cryogenic Transmission  
693 Electron Microscopy, *ACS Central Sci.*, 2, 40-47, 10.1021/acscentsci.5b00344, 2016.

694 Poschl, U.: Atmospheric aerosols: Composition, transformation, climate and health effects, *Angew.*  
695 *Chem. Int. Edit.*, 44, 7520-7540, 10.1002/anie.200501122, 2005.

696 Posfai, M., Li, J., Anderson, J. R., and Buseck, P. R.: Aerosol bacteria over the southern ocean during  
697 ACE-1, *Atmos. Res.*, 66, 231-240, 2003.

698 Pratt, K. A., DeMott, P. J., French, J. R., Wang, Z., Westphal, D. L., Heymsfield, A. J., Twohy, C. H.,  
699 Prenni, A. J., and Prather, K. A.: In situ detection of biological particles in cloud ice-crystals, *Nat. Geosci.*,  
700 2, 398-401, 2009.

Prenni, A. J., Petters, M. D., Kreidenweis, S. M., Heald, C. L., Martin, S. T., Artaxo, P., Garland, R. M., Wollny, A. G., and Poschl, U.: Relative roles of biogenic emissions and Saharan dust as ice nuclei in the Amazon basin, *Nat. Geosci.*, 2, 402-405, 2009.

Priyamvada, H., Singh, R. K., Akila, M., Ravikrishna, R., Verma, R. S., and Gunthe, S. S.: Seasonal variation of the dominant allergenic fungal aerosols – One year study from southern Indian region, *Scientific Reports*, 7, 11171, 10.1038/s41598-017-11727-7, 2017.

Reponen, T., Willeke, K., Ulevicius, V., Reponen, A., and Grinshpun, S. A.: Effect of relative humidity on the aerodynamic diameter and respiratory deposition of fungal spores, *Atmos. Environ.*, 30, 3967-3974, [https://doi.org/10.1016/1352-2310\(96\)00128-8](https://doi.org/10.1016/1352-2310(96)00128-8), 1996.

Riener, N., Ault, A. P., West, M., Craig, R. L., and Curtis, J. H.: Aerosol Mixing State: Measurements, Modeling, and Impacts, *Rev. Geophys.*, 57, <https://doi.org/10.1029/2018RG000615>, 2019.

Rissler, J., Vestin, A., Swietlicki, E., Fisch, G., Zhou, J., Artaxo, P., and Andreae, M. O.: Size distribution and hygroscopic properties of aerosol particles from dry-season biomass burning in Amazonia, *Atmos. Chem. Phys.*, 6, 471-491, 10.5194/acp-6-471-2006, 2006.

Shi, Z., Shao, L., Jones, T. P., Whittaker, A. G., Lu, S., Berube, K. A., He, T., and Richards, R. J.: Characterization of airborne individual particles collected in an urban area, a satellite city and a clean air area in Beijing, 2001, *Atmos. Environ.*, 37, 4097-4108, 2003.

Shi, Z., He, K., Xue, Z., Yang, F., Chen, Y., Ma, Y., and Luo, J.: Properties of individual aerosol particles and their relation to air mass origins in a south China coastal city, *J. Geophys. Res.*, 114, doi:10.1029/2008JD011221, 2009.

Smith, D. J., Ravichandar, J. D., Jain, S., Griffin, D. W., Yu, H., Tan, Q., Thissen, J., Lusby, T., Nicoll, P., Shedler, S., Martinez, P., Osorio, A., Lechniak, J., Choi, S., Sabino, K., Iverson, K., Chan, L., Jaing, C., and McGrath, J.: Airborne Bacteria in Earth's Lower Stratosphere Resemble Taxa Detected in the Troposphere: Results From a New NASA Aircraft Bioaerosol Collector (ABC), *Front. Microbiol.* 9, 10.3389/fmicb.2018.01752, 2018.

Spracklen, D. V., Bonn, B., and Carslaw, K. S.: Boreal forests, aerosols and the impacts on clouds and climate, *Philos. T. R. Soc. A.*, 366, 4613-4626, 10.1098/rsta.2008.0201, 2008.

Sun, J., Liu, L., Xu, L., Wang, Y., Wu, Z., Hu, M., Shi, Z., Li, Y., Zhang, X., Chen, J., and Li, W.: Key Role of Nitrate in Phase Transitions of Urban Particles: Implications of Important Reactive Surfaces for Secondary Aerosol Formation, *J. Geophys. Res.*, 123, 1234-1243, 10.1002/2017JD027264, 2018.

Tamer Vestlund, A., Al-Ashaab, R., Tyrrel, S. F., Longhurst, P. J., Pollard, S. J. T., and Drew, G. H.: Morphological classification of bioaerosols from composting using scanning electron microscopy, *Waste Manage.*, 34, 1101-1108, <https://doi.org/10.1016/j.wasman.2014.01.021>, 2014.

Therkorn, J., Thomas, N., Scheinbeim, J., and Mainelis, G.: Field performance of a novel passive bioaerosol sampler using polarized ferroelectric polymer films, *Aerosol Sci. Techn.*, 51, 787-800, 10.1080/02786826.2017.1316830, 2017.

Tobo, Y., Prenni, A. J., DeMott, P. J., Huffman, J. A., McCluskey, C. S., Tian, G., Pöhlker, C., Pöschl, U., and Kreidenweis, S. M.: Biological aerosol particles as a key determinant of ice nuclei populations in a forest ecosystem, *J. Geophys. Res.*, 118, 10,100-110,110, 10.1002/jgrd.50801, 2013.

Tong, Y., and Lighthart, B.: The Annual Bacterial Particle Concentration and Size Distribution in the Ambient Atmosphere in a Rural Area of the Willamette Valley, Oregon, *Aerosol Sci. Techn.*, 32, 393-403, 10.1080/027868200303533, 2000.

Toprak, E., and Schnaiter, M.: Fluorescent biological aerosol particles measured with the Waveband

Integrated Bioaerosol Sensor WIBS-4: laboratory tests combined with a one year field study, *Atmos. Chem. Phys.*, 13, 225-243, 10.5194/acp-13-225-2013, 2013.

Troutt, C., and Levetin, E.: Correlation of spring spore concentrations and meteorological conditions in Tulsa, Oklahoma, *Int. J. Biometeorol.*, 45, 64-74, 10.1007/s004840100087, 2001.

Tunved, P., Hansson, H.-C., Kerminen, V.-M., Ström, J., Maso, M. D., Lihavainen, H., Viisanen, Y., Aalto, P. P., Komppula, M., and Kulmala, M.: High Natural Aerosol Loading over Boreal Forests, *Science*, 312, 261-263, 10.1126/science.1123052, 2006.

Twohy, C. H., McMeeking, G. R., DeMott, P. J., McCluskey, C. S., Hill, T. C. J., Burrows, S. M., Kulkarni, G. R., Tanarhte, M., Kafle, D. N., and Toohey, D. W.: Abundance of fluorescent biological aerosol particles at temperatures conducive to the formation of mixed-phase and cirrus clouds, *Atmos. Chem. Phys.*, 16, 8205-8225, 10.5194/acp-16-8205-2016, 2016.

Valsan, A. E., Priyamvada, H., Ravikrishna, R., Despré, V. R., Biju, C. V., Sahu, L. K., Kumar, A., Verma, R. S., Philip, L., and Gunthe, S. S.: Morphological characteristics of bioaerosols from contrasting locations in southern tropical India – A case study, *Atmos. Environ.*, 122, 321-331, <https://doi.org/10.1016/j.atmosenv.2015.09.071>, 2015.

Valsan, A. E., Ravikrishna, R., Biju, C. V., Pöhlker, C., Despré, V. R., Huffman, J. A., Pöschl, U., and Gunthe, S. S.: Fluorescent biological aerosol particle measurements at a tropical high-altitude site in southern India during the southwest monsoon season, *Atmos. Chem. Phys.*, 16, 9805-9830, 10.5194/acp-16-9805-2016, 2016.

Whitehead, J. D., Darbyshire, E., Brito, J., Barbosa, H. M. J., Crawford, I., Stern, R., Gallagher, M. W., Kaye, P. H., Allan, J. D., Coe, H., Artaxo, P., and McFiggans, G.: Biogenic cloud nuclei in the central Amazon during the transition from wet to dry season, *Atmos. Chem. Phys.*, 16, 9727-9743, 10.5194/acp-16-9727-2016, 2016.

Wilson, T. W., Ladino, L. A., Alpert, P. A., Breckels, M. N., Brooks, I. M., Browse, J., Burrows, S. M., Carslaw, K. S., Huffman, J. A., Judd, C., Kilthau, W. P., Mason, R. H., McFiggans, G., Miller, L. A., Nájera, J. J., Polishchuk, E., Rae, S., Schiller, C. L., Si, M., Temprado, J. V., Whale, T. F., Wong, J. P. S., Wurl, O., Yakobi-Hancock, J. D., Abbatt, J. P. D., Aller, J. Y., Bertram, A. K., Knopf, D. A., and Murray, B. J.: A marine biogenic source of atmospheric ice-nucleating particles, *Nature*, 525, 234, 10.1038/nature14986, 2015.

Wittmaack, K.: Brochosomes produced by leafhoppers-a widely unknown, yet highly abundant species of bioaerosols in ambient air, *Atmos. Environ.*, 39, 1173-1180, <https://doi.org/10.1016/j.atmosenv.2004.11.003>, 2005.

Wittmaack, K., Wehnes, H., Heinzmann, U., and Agerer, R.: An overview on bioaerosols viewed by scanning electron microscopy, *Sci. Total Environ.*, 346, 244-255, <https://doi.org/10.1016/j.scitotenv.2004.11.009>, 2005.

Wu, L., Li, X., Kim, H., Geng, H., Godoi, R. H. M., Barbosa, C. G. G., Godoi, A. F. L., Yamamoto, C. I., de Souza, R. A. F., Pöhlker, C., Andreae, M. O., and Ro, C. U.: Single-particle characterization of aerosols collected at a remote site in the Amazonian rainforest and an urban site in Manaus, Brazil, *Atmos. Chem. Phys.*, 19, 1221-1240, 10.5194/acp-19-1221-2019, 2019.

Yue, S., Ren, H., Fan, S., Wei, L., Zhao, J., Bao, M., Hou, S., Zhan, J., Zhao, W., Ren, L., Kang, M., Li, L., Zhang, Y., Sun, Y., Wang, Z., and Fu, P.: High Abundance of Fluorescent Biological Aerosol Particles in Winter in Beijing, China, *ACS Earth Space Chem.*, 1, 493-502, 10.1021/acsearthspacechem.7b00062, 2017.

Zawadowicz, M. A., Froyd, K. D., Murphy, D. M., and Cziczo, D. J.: Improved identification of primary



789 biological aerosol particles using single-particle mass spectrometry, *Atmos. Chem. Phys.*, 17, 7193-7212,  
790 10.5194/acp-17-7193-2017, 2017.  
791 Zhang, D., Murata, K., Hu, W., Yuan, H., Li, W., Matsusaki, H., and Kakikawa, M.: Concentration and  
792 Viability of Bacterial Aerosols Associated with Weather in Asian Continental Outflow: Current  
793 Understanding, *Aerosol Sci. Engin.*, 1-12, 10.1007/s41810-017-0008-y, 2017.

# Supplemental Materials

## **Overview of primary biological aerosol particles from a Chinese boreal forest: insight into morphology, size, and mixing state at microscopic scale**

Weijun Li<sup>1</sup>, Lei Liu<sup>1</sup>, Qi Yuan<sup>1</sup>, Liang Xu<sup>1</sup>, Yanhong Zhu<sup>1</sup>, Bingbing Wang<sup>2</sup>, Hua Yu<sup>3</sup>, Xiaokun Ding<sup>4</sup>, Jian Zhang<sup>1</sup>, Dao Huang<sup>1</sup>, Dantong Liu<sup>1</sup>, Wei Hu<sup>5</sup>, Daizhou Zhang<sup>6</sup>, Pingqing Fu<sup>5</sup>, Maosheng Yao<sup>7</sup>, Min Hu<sup>7</sup>, Xiaoye Zhang<sup>8</sup>, Zongbo Shi<sup>9,5</sup>

<sup>1</sup>Department of Atmospheric Sciences, School of Earth Sciences, Zhejiang University, Hangzhou 310027, China

<sup>2</sup>State Key Laboratory of Marine Environmental Science, College of Ocean and Earth Sciences, Xiamen University, Xiamen 361102, China.

<sup>3</sup>College of Life and Environmental Sciences, Hangzhou Normal University, 310036, Hangzhou, China

<sup>4</sup>Department of Chemistry, Zhejiang University, Hangzhou 310027, China

<sup>5</sup>Institute of Surface-Earth System Science, Tianjin University, 300072, Tianjin, China

<sup>6</sup>Faculty of Environmental and Symbiotic Sciences, Prefectural University of Kumamoto, Kumamoto 862-8502, Japan

<sup>7</sup>State Key Joint Laboratory of Environmental Simulation and Pollution Control, College of Environmental Sciences and Engineering, Peking University, Beijing 100871, China

<sup>8</sup>Key Laboratory of Atmospheric Chemistry, Chinese Academy of Meteorological Sciences, Beijing, China

<sup>9</sup>School of Geography, Earth and Environmental Sciences, University of Birmingham,  
Birmingham B15 2TT, UK

*\*Correspondence to:* Weijun Li (liweijun@zju.edu.cn)

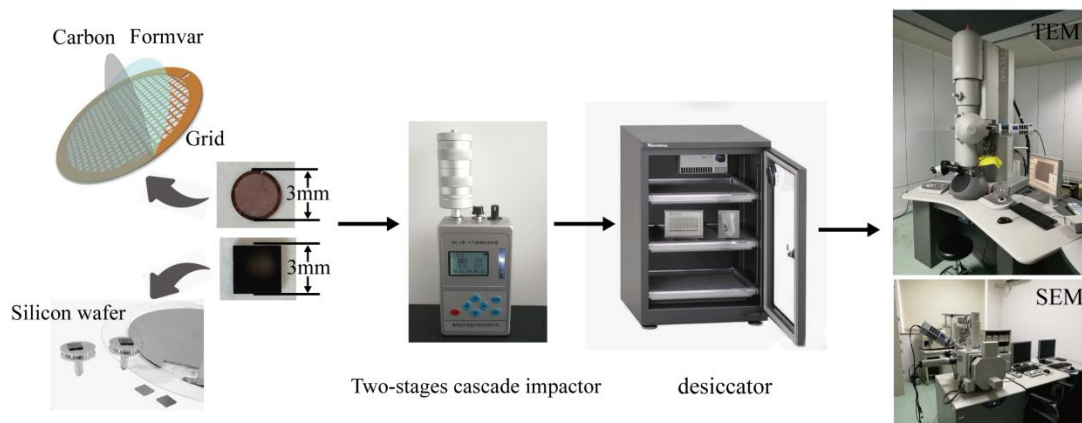

**Figure S1** The sampling procedures of substrate, sampler, storage, and analyzed technique.

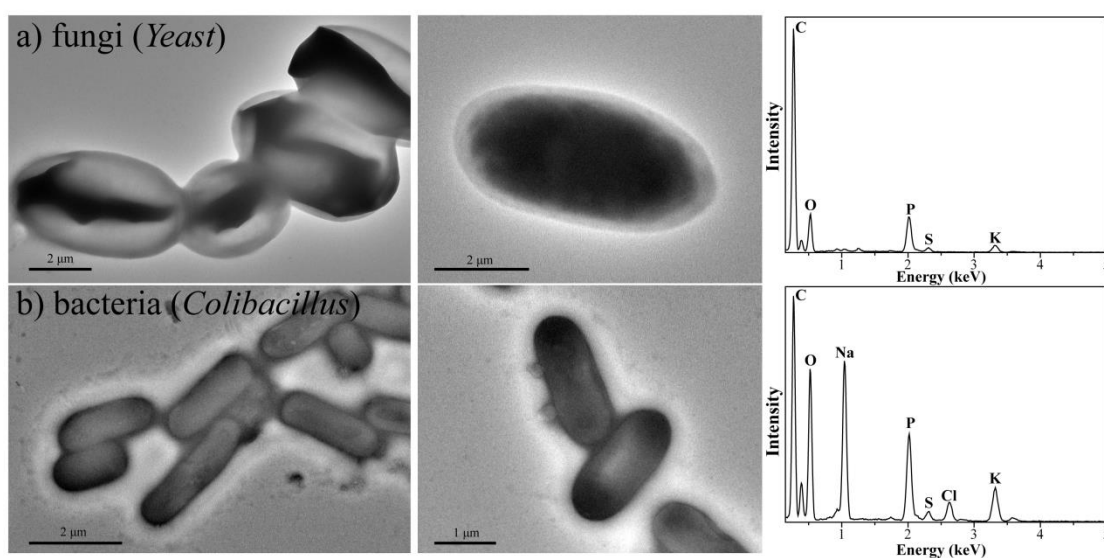

**Figure S2** The *Yeast* and the *colibacillus* particles cultivated in laboratory. TEM image showing morphology and EDS showing compositions.

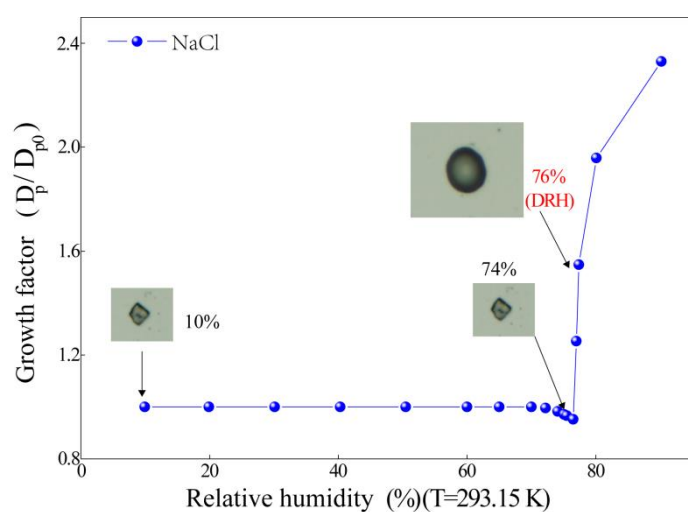

**Figure S3** Hygroscopic growth of NaCl generated in laboratory

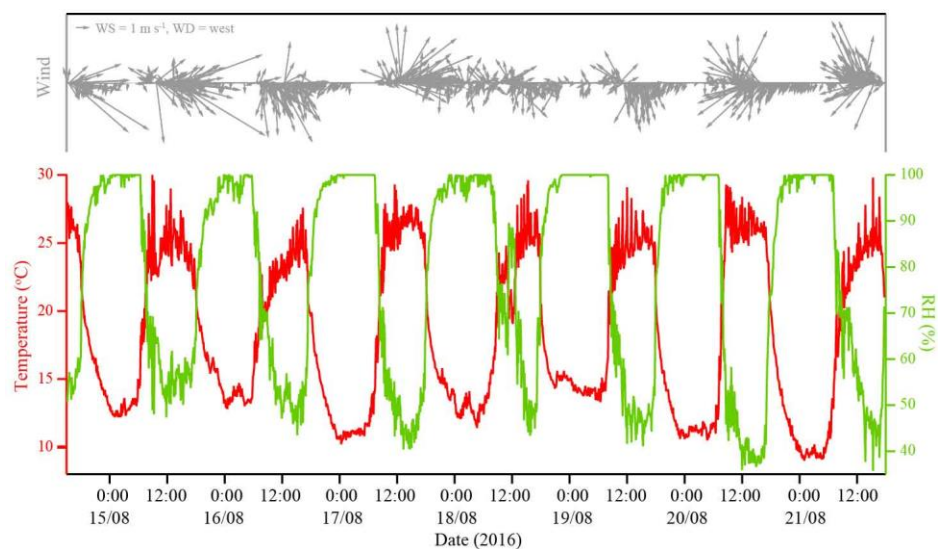

**Figure S4** Meteorological data during the sampling including Wind speed and direction, Temperature, and relative humidity (RH).

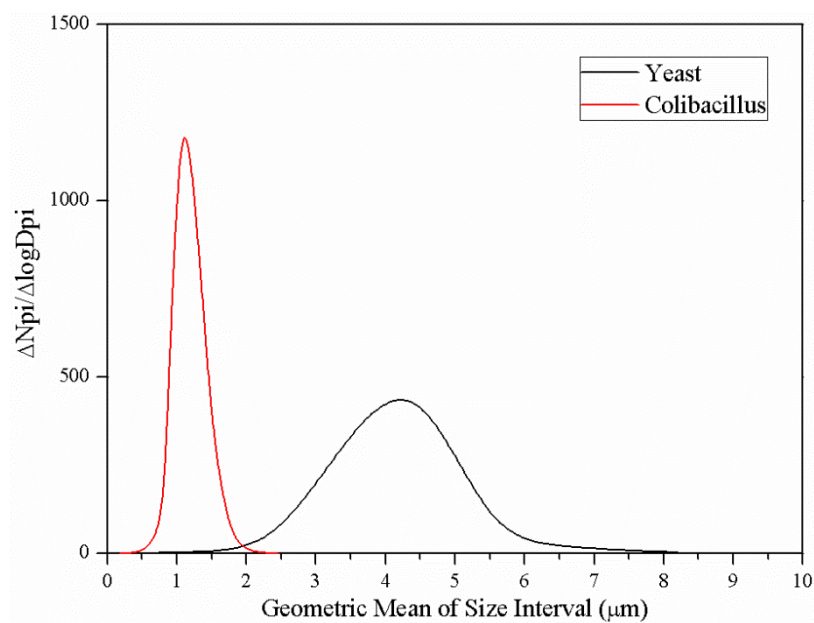

**Figure S5** Size distribution of Yeast and Colibacillus cultivated in laboratory.

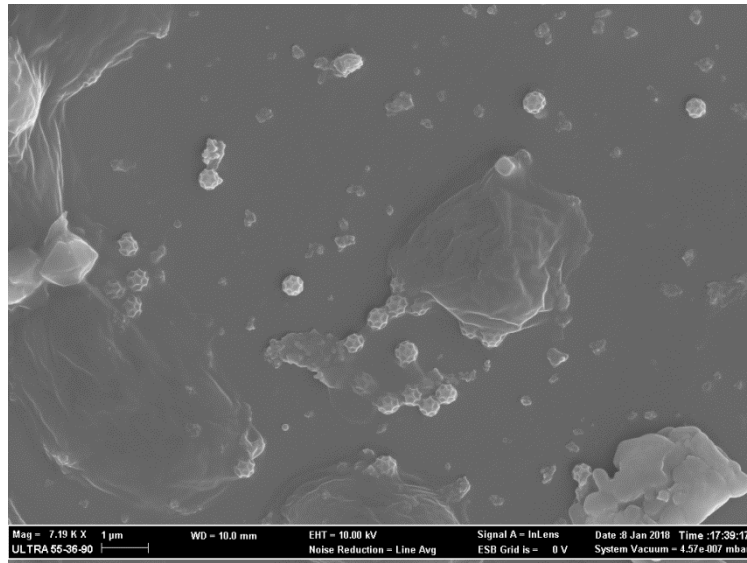

**Figure S6** SEM images of brochosomes.

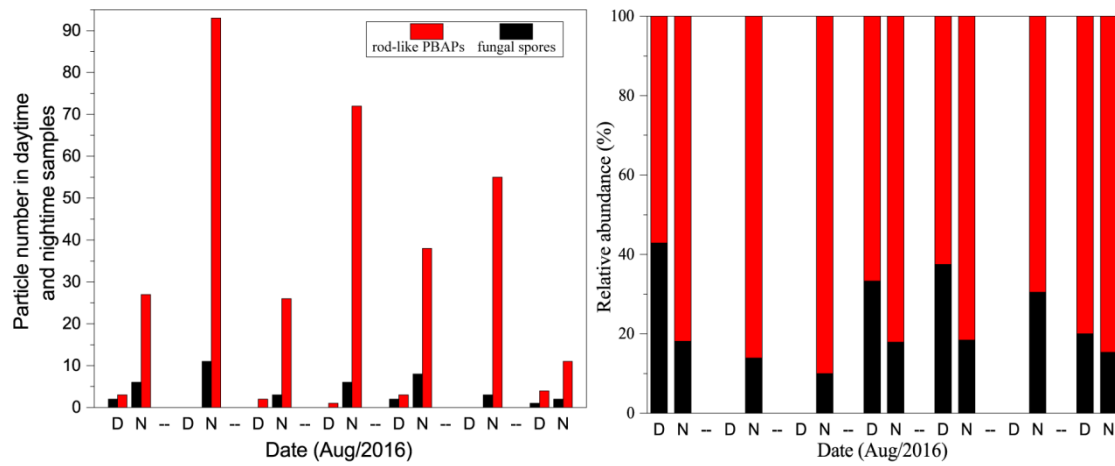

**Figure S7** Particle number and relative abundance of rod-like PBAPs and fungal spores in the samples collected in daytime and nighttime.
